# Supplementary material for: Evaluating the feasibility and acceptability of a safety protocol to mitigate SARS-CoV-2 transmission risks when participating in full-capacity live mass events: a cross-sectional survey and interview-based study
Source: PubMed Central journal article supplement — BMJ Open. 2022 Dec 23;12(12):e063838. doi: 10.1136/bmjopen-2022-063838 (PMC9791109; doi:10.1136/bmjopen-2022-063838), 2022-12-23
Supplement: bmjopen-2022-063838.draft_revisions.pdf [file bmjopen-2022-063838.draft_revisions.pdf]

# BMJ Open

BMJ Open is committed to open peer review. As part of this commitment we make the peer review history of every article we publish publicly available.

When an article is published we post the peer reviewers' comments and the authors' responses online. We also post the versions of the paper that were used during peer review. These are the versions that the peer review comments apply to.

The versions of the paper that follow are the versions that were submitted during the peer review process. They are not the versions of record or the final published versions. They should not be cited or distributed as the published version of this manuscript.

BMJ Open is an open access journal and the full, final, typeset and author-corrected version of record of the manuscript is available on our site with no access controls, subscription charges or pay-per-view fees (<http://bmjopen.bmj.com>).

If you have any questions on BMJ Open's open peer review process please email [info.bmjopen@bmj.com](mailto:info.bmjopen@bmj.com)

# BMJ Open

## Evaluating the feasibility and acceptability of a safety protocol to mitigate SARS-CoV-2 transmission risks when participating in full-capacity live mass events: a cross-sectional survey and interview-based study

|                               |                                                                                                                                                                                                                                                                                                                                                                                                                                                                                                   |
|-------------------------------|---------------------------------------------------------------------------------------------------------------------------------------------------------------------------------------------------------------------------------------------------------------------------------------------------------------------------------------------------------------------------------------------------------------------------------------------------------------------------------------------------|
| Journal:                      | <i>BMJ Open</i>                                                                                                                                                                                                                                                                                                                                                                                                                                                                                   |
| Manuscript ID                 | bmjopen-2022-063838                                                                                                                                                                                                                                                                                                                                                                                                                                                                               |
| Article Type:                 | Original research                                                                                                                                                                                                                                                                                                                                                                                                                                                                                 |
| Date Submitted by the Author: | 22-Apr-2022                                                                                                                                                                                                                                                                                                                                                                                                                                                                                       |
| Complete List of Authors:     | Dallera, Giulia; Imperial College London, Department of Primary Care and Public Health<br>Alaa, Aos; Imperial College London, Department of Primary Care and Public Health<br>El-Osta, Austen; Imperial College London, Department of Primary Care and Public Health<br>Kreindler, Jack; Imperial College London, Department of Primary Care and Public Health; Centre for Health and Human Performance<br>Harris, Matthew; Imperial College London, Department of Primary Care and Public Health |
| Keywords:                     | COVID-19, PUBLIC HEALTH, Infection control < INFECTIOUS DISEASES, Public health < INFECTIOUS DISEASES, Protocols & guidelines < HEALTH SERVICES ADMINISTRATION & MANAGEMENT, Risk management < HEALTH SERVICES ADMINISTRATION & MANAGEMENT                                                                                                                                                                                                                                                        |
|                               |                                                                                                                                                                                                                                                                                                                                                                                                                                                                                                   |

SCHOLARONE™  
Manuscripts

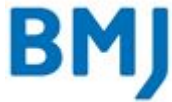

I, the Submitting Author has the right to grant and does grant on behalf of all authors of the Work (as defined in the below author licence), an exclusive licence and/or a non-exclusive licence for contributions from authors who are: i) UK Crown employees; ii) where BMJ has agreed a CC-BY licence shall apply, and/or iii) in accordance with the terms applicable for US Federal Government officers or employees acting as part of their official duties; on a worldwide, perpetual, irrevocable, royalty-free basis to BMJ Publishing Group Ltd ("BMJ") its licensees and where the relevant Journal is co-owned by BMJ to the co-owners of the Journal, to publish the Work in this journal and any other BMJ products and to exploit all rights, as set out in our [licence](#).

The Submitting Author accepts and understands that any supply made under these terms is made by BMJ to the Submitting Author unless you are acting as an employee on behalf of your employer or a postgraduate student of an affiliated institution which is paying any applicable article publishing charge ("APC") for Open Access articles. Where the Submitting Author wishes to make the Work available on an Open Access basis (and intends to pay the relevant APC), the terms of reuse of such Open Access shall be governed by a Creative Commons licence – details of these licences and which [Creative Commons](#) licence will apply to this Work are set out in our licence referred to above.

Other than as permitted in any relevant BMJ Author's Self Archiving Policies, I confirm this Work has not been accepted for publication elsewhere, is not being considered for publication elsewhere and does not duplicate material already published. I confirm all authors consent to publication of this Work and authorise the granting of this licence.

# Evaluating the feasibility and acceptability of a safety protocol to mitigate SARS-CoV-2 transmission risks when participating in full-capacity live mass events: a cross-sectional survey and interview-based study

---

1. Giulia Dallera<sup>1\*</sup>
2. AOs Alaa<sup>1</sup>
3. Austen El-Osta<sup>1</sup>
4. Jack Kreindler<sup>1,2,3</sup>
5. Matthew Harris<sup>1</sup>

<sup>1</sup>Imperial College London, Department of Primary Care and Public Health

<sup>2</sup>CERTIFIC

<sup>3</sup>Centre for Health and Human Performance

\*Corresponding author: Giulia Dallera, Department of Primary Care and Public Health, Imperial College London, Reynolds Building, Charing Cross Hospital, London W6 8RP  
Phone: 07864231435  
Email: [giulia.dallera20@imperial.ac.uk](mailto:giulia.dallera20@imperial.ac.uk)

**Word count:** 3998

# Abstract

**Objectives:** To investigate the feasibility and acceptability of a novel COVID-19 safety protocol combining professionally witnessed home-based videoed pre-event testing and a data-driven risk assessment model that was implemented at Standon Calling Festival in July 2021.

**Design:** Observational study using a sequential explanatory mixed-methods design.

**Setting:** Standon Calling Festival, Hertfordshire, England.

**Participants:** 1,093 survey respondents who attended Standon Calling Festival in July 2021, 11 of whom were interviewed.

**Results:** Respondents reported that the videoed lateral flow test (LFT) was straightforward, non-intrusive, inexpensive and improved the ability to self-test. Participants felt safe at the event knowing that everyone had followed a robust testing protocol to mitigate the spread of COVID-19. Participants reported that medically certified home-based testing has the potential for use in other health spheres, although over-reliance on test results alone may create a false sense of security.

**Conclusions:** Our study showed that a protocol that combines professionally witnessed home-based videoed pre-event testing is highly acceptable and feasible, and it can inform decision making and support the safe reopening of live mass events at full capacity. Although COVID-19 is now considered endemic in the UK, this protocol can be of value for other countries where the live events industry remains heavily impacted. Risk-modelling should be tested and evaluated at future events to further increase the robustness of this protocol.

**Key Words:** COVID-19; live events management; safety protocol; medically certified testing; risk mitigation.

## Strengths and limitations

- This was the first study evaluating the feasibility and acceptability of a COVID-19 safety protocol for the safe reopening of live mass events at full capacity.
- We used a sequential explanatory mixed-methods design, whereby quantitative findings from an online questionnaire informed the collection of contextual data from interviews and one focus group discussion.
- We surveyed 1,093 respondents who previously attended a mass live event, and surfaced assumptions from 11 participants to explore barriers and drivers for routine adoption of witnessed rapid lateral flow testing.
- We were unable to evaluate the utility of risk-modelling as a decision tool because the event had already been given permission to go ahead, however it was successfully conducted in real-time, and its projections reflected the number of COVID-19 cases measured by Test and Trace.

# Introduction

As part of the public health response to limit the spread of COVID-19, live events were suspended in the United Kingdom (UK) for several months since the first national lockdown in March. The lockdown negatively impacted the country's economy and the mental health of individuals, calling for the deployment of innovative strategies to help reopen live events safely while enabling venues to operate at near or full capacity [1, 2].

Under the auspices of the UK government's Events Research Programme (ERP), a small number of legally permitted live events took place during lockdown between April and July 2021, with the aim of investigating the risk of COVID-19 transmission to inform the reopening of live mass events. Attendees were required to show proof of a negative lateral flow test (LFT), double vaccination, or natural immunity when entering the venue [3]. Findings showed that COVID-19 transmission was in line with or below community level at most events [4]. However, risk of transmission was highest at outdoor unseated events and may have been influenced by individual behaviour before and during the event, vaccination coverage, event size and duration, as well as the prevalence of COVID-19 at the time of the event, suggesting that findings from the ERP may not be generalisable to all live events.

To account for contextual differences between events, and to further increase the effectiveness and usefulness of pre-event testing for safe reopening of live events at full capacity, the CAPACITY protocol combined mass pre-event LFT testing and a data-driven risk assessment model based on levels of immunity (vaccination status) in the event population [1, 5]. The premise was that at-home, professionally verified LFT testing, combined with ticket validation and real-time risk modelling of transmission at the event would catch asymptomatic infected ticket holders before travelling to the event, and support public health authorities to make informed, data-driven decisions around the overall safety of the event. During ticket purchase, customers completed a risk questionnaire and purchased a LFT to be taken within 48 hours of entering the venue. The test was videoed and validated by a professionally trained testing control officer based on the assessment of the sample collection method. The test result was linked to a QR code that would generate a go/no-go signal to attend the event. The risk prediction model would estimate the number of infectious people at the event, their infectivity, and the risk of transmission at the event, based on parameters such as community background prevalence, characteristics of the venue and of the audience attending the event, including their vaccination status. By providing event-specific risk estimates, this protocol had the potential to inform ticketholders, event organisers, public health authorities and health systems to guide decision making as to whether the live event should go ahead as planned [6].

1  
2  
3  
4  
5  
6  
7  
8  
9  
10  
11  
12  
13  
14  
15  
16  
17  
18  
19  
20  
21  
22  
23  
24  
25  
26  
27  
28  
29  
30  
31  
32  
33  
34  
35  
36  
37  
38  
39  
40  
41  
42  
43  
44  
45  
46  
47  
48  
49  
50  
51  
52  
53  
54  
55  
56  
57  
58  
59  
60

The CAPACITY protocol was trialled in July 2021 at Standon Calling Festival (SCF), an independent boutique music festival that takes place annually in Hertfordshire. Although SCF was cancelled in Summer 2020, the festival resumed in Summer 2021 at full capacity (~15,000 people), in part because the proposed CAPACITY safety protocol helped to assuage concerns around event safety at the time, and was therefore the first event to be held outside of the ERP [7, 8].

The aim of our study was to investigate the views and perceptions of attendees at SCF on the feasibility and acceptability of the CAPACITY protocol using a mixed-methods design.

## Methods

### Study design

We adopted a sequential explanatory mixed methods design, whereby quantitative data collection and analysis were followed by the collection and analysis of contextual data [9]. In the first phase of the study, we collected quantitative data through an online questionnaire. The analysis of quantitative data informed the second phase of the study, during which we collected and analysed data from in-depth semi-structured interviews and a focus group discussion to further explore and expand the quantitative findings from the first phase of the study.

### Quantitative methodology

#### Participants

Adults who attended SCF in July 2021 and gave permission to be contacted by the research team during ticket purchase were eligible to participate in the survey and were contacted via email (n=4,726). The survey was voluntary, and participants were free to decide whether they wanted to take part.

#### Data collection

Participants were surveyed anonymously in the first two weeks of November 2021 through an online questionnaire to capture their views and experiences regarding the safety protocol put in place at SCF to minimise the spread and exposure to COVID-19. Members of the study team beta-tested the survey for usability and technical functionality prior to distribution. The survey was distributed on 3 November 2021 via web-link on the Qualtrics platform, with one reminder sent the following week.



1  
2  
3 The online survey comprised of 17 total items organised in five different blocks. The first  
4 captured the sociodemographic characteristics of participants, including age, gender, and  
5 ethnicity, as well as their COVID-19 vaccine status and frequency of COVID-19 testing at  
6 home before the event. The second block of questions captured participant feedback on  
7 pre-event videoed COVID-19 testing, focusing on the convenience of the procedure, data  
8 security, intrusiveness, cost, and its impact on their confidence to self-test correctly. The  
9 third block investigated the experience and sense of safety of participants at the event,  
10 and the extent to which they adopted other protective measures against COVID-19. The  
11 last two set of questions sought to determine if respondents tested positive to COVID-19  
12 within two weeks after attending the event, explored general views on pre-event safety  
13 measures, and whether respondents would recommend videoed testing for future events.  
14 The survey included multiple choice, Likert 5-point scale, and yes/no questions.  
15 Participants were asked to give consent at the start of the survey and were free to change  
16 their response up until the point of submitting the survey. All data was stored on a  
17 password encrypted database which only the study team had access to.  
18  
19  
20  
21  
22  
23

### 24 **Data analysis**

25 Sociodemographic characteristics of respondents and responses to survey questions  
26 were analysed using routine descriptive statistical methods with STATA/SE 17.0.  
27  
28  
29  
30

## 31 **Qualitative methodology**

### 32 **Participants**

33 Interviewees were randomly selected among survey respondents who voluntarily  
34 provided their contact details to be approached for a follow-up interview. Potential  
35 interviewees were contacted via email. All participants who agreed to be interviewed were  
36 asked to complete a consent form before the interview, and all gave verbal consent at the  
37 start of the interview.  
38  
39  
40  
41

### 42 **Data collection**

43 Semi-structured personal interviews and a focus group discussion were conducted  
44 through Microsoft Teams between December 2021 and January 2022 by two  
45 researchers. Thematic saturation was achieved after seven in depth personal interviews  
46 and one focus group discussion with 4 participants (n=11 total participants), each lasting  
47 between thirty and sixty minutes. Interviews were recorded, auto-transcribed, manually  
48 checked, and pseudonymised. The research team developed an interview guide with  
49 open-ended questions that was informed by findings from the online questionnaire,  
50 seeking to further explore the experience of participants at SCF, to capture the enablers  
51 and barriers to participate in COVID-secure live events, and to investigate attitudes and  
52 perceptions on pre-event safety measures and medically certified home-based testing.  
53  
54  
55  
56  
57  
58  
59

## Data analysis

Interview transcripts were analysed inductively through thematic analysis by manually identifying codes and subsequently through the formation of themes. Two researchers reviewed the transcripts and agreed on the emergent themes, that were further discussed with the research team. Once emergent themes were categorised and considered in context, quotes from transcripts reflecting key themes were captured.

## Ethics

The study received ethical approval from the Imperial College London Ethics Committee (ICREC 21IC6705). The survey was anonymous, and respondents were not asked to provide personal details unless they voluntarily expressed to be contacted for a follow-up interview. Participants were asked to give written and oral consent before the start of interviews. Participants were free to withdraw from the survey or interview at any time. A lottery to receive free tickets to the next SCF was provided by the event organisers as an inducement for ticket holders to participate in the evaluation. Interview data was pseudonymised.

## Patient and Public Involvement

No patient was involved in this study.

# Results

A total of 1,093 respondents completed the survey, and contextual data was collected by interviewing 11 participants. Results from the survey and interviews are reported in the following sections.

## Survey

Results from the survey were reported using the CHERRIES Checklist [10]. A total of 1,093 participants completed the survey out of the 4,726 that were contacted (response rate 23.1%). Characteristics of survey respondents are summarised in **Table 1**, and survey results are reported in **Supplemental Table S1**.

**Table 1: sample size and characteristics of respondents of the survey.**

|               | N    | %     |
|---------------|------|-------|
| <b>Total</b>  | 1093 | 100.0 |
| <b>Gender</b> |      |       |
| <b>Female</b> | 711  | 65.5  |
| <b>Male</b>   | 374  | 34.5  |

|                                                          |      |      |
|----------------------------------------------------------|------|------|
| <b>Age</b>                                               |      |      |
| 15-24                                                    | 122  | 11.3 |
| 25-39                                                    | 290  | 26.7 |
| 40-54                                                    | 483  | 44.6 |
| ≥55                                                      | 186  | 17.4 |
| <b>Ethnicity</b>                                         |      |      |
| White                                                    | 1030 | 95.5 |
| Mixed/multiple ethnic groups                             | 28   | 2.6  |
| Asian/Asian British                                      | 8    | 0.7  |
| Black/African/Caribbean/Black British                    | 2    | 0.2  |
| Other                                                    | 11   | 1.0  |
| <b>COVID-19 vaccine status before the event</b>          |      |      |
| Fully vaccinated (2 doses)                               | 832  | 76.2 |
| Partially vaccinated (1 dose)                            | 220  | 20.2 |
| Not vaccinated                                           | 41   | 3.6  |
| <b>Routine COVID-19 testing at home before the event</b> |      |      |
| At least once a week                                     | 504  | 46.2 |
| Not regularly                                            | 457  | 41.8 |
| Never                                                    | 131  | 12.0 |

Overall, most respondents agreed or strongly agreed that videoed pre-event testing was convenient (81.0 %, **Figure 1**) and not intrusive (82.8%), and about three-quarters of respondents agreed or strongly agreed that the cost of the test was reasonable (73.6%). A significant proportion of respondents agreed or strongly agreed that they were not concerned with the security of their data (72.6%), and about three-quarters of respondents agreed or strongly agreed that they felt confident in their results knowing that the pre-event testing was videoed (76.2%).

Nearly half the respondents (45.0%) felt that having completed a videoed LFT increased their confidence to self-test correctly. Less than 1% of respondents (0.4%) felt they were still not confident to self-test correctly.

Most respondents agreed or strongly agreed that knowing that everyone at the event had been tested made them feel safer (85.5%, **Figure 1**). The large majority disagreed or strongly disagreed that pre-event testing interfered with how much fun they had at the event (93.7%).

About half of respondents reported having regularly washed their hands during the event (51.2%), making it the most common form of prevention against COVID-19. One-third of respondents reported having socially distanced to some extent (33.4%), although only a small proportion reported having maintained social distancing at most times during the event (8.1%). More than half of respondents reported not having worn a face mask or covering at all throughout the event (54.7%).

1  
2  
3  
4 Almost all respondents reported not having tested positive for COVID-19 within two weeks  
5 of attendance to SCF (1,053 respondents, 95.5%). Only 38 respondents (3.5%) tested  
6 positive for COVID-19 within two weeks of attendance to the event.  
7  
8

9  
10 Most respondents agreed or strongly agreed that pre-event testing reduces the risk of  
11 catching COVID-19 (87.1%, **Figure 1**), however nearly all respondents (97.5%) agreed  
12 or strongly agreed that it cannot reduce the risk to zero. A significant proportion of  
13 respondents agreed or strongly agreed that other events should adopt videoed testing at  
14 home (76.4%). About a third of respondents agreed that they would have valued to  
15 receive a personal risk score of catching COVID-19 at the event (35.6%), while another  
16 third was neutral about this (34.8%). The majority of respondents (89.4%) agreed or  
17 strongly agreed that home-based testing was preferred to at-the-door testing.  
18  
19

20  
21 Most respondents (93.7%) reported that the requirement of at-home videoed rapid testing  
22 would not influence their decision to attend future events.  
23  
24  
25

## 26 Interviews

27  
28 By interviewing a subset of survey respondents, we were able to further explore the  
29 findings from the online questionnaire. The characteristics of interviewees are  
30 summarised in **Table 2**.  
31  
32

33 Although the risk modelling was successfully conducted in real-time and its projections  
34 were largely in line with the number of COVID-19 cases that emerged from SCF as  
35 measured by Test and Trace, it was not used at the event because permission for it to go  
36 ahead had already been granted. Therefore, we were unable to interview public health  
37 authorities to assess the utility of the risk modelling as a go/no-go decision tool.  
38  
39

40  
41 Three main themes emerged from the data: overall impressions of respondents on the  
42 safety protocol, particularly on its feasibility, acceptability, and the learning associated  
43 with it; experience of respondents at the event, including the impact of the safety protocol  
44 on their sense of safety, and the use of other protective measures against COVID-19;  
45 general views on the value and relevance of pre-event safety procedures and on  
46 medically certified home-based testing.  
47  
48  
49

50  
51 **Table 2: sample size and characteristics of interviewees**

|        | N (%) | %     |
|--------|-------|-------|
| Total  | 11    | 100.0 |
| Gender |       |       |

|                  |                                     |   |      |
|------------------|-------------------------------------|---|------|
|                  | <b>Female</b>                       | 6 | 54.5 |
|                  | <b>Male</b>                         | 5 | 45.4 |
| <b>Age</b>       |                                     |   |      |
|                  | <b>15-24</b>                        | 2 | 18.2 |
|                  | <b>25-39</b>                        | 1 | 9.1  |
|                  | <b>40-54</b>                        | 1 | 9.1  |
|                  | <b>≥55</b>                          | 7 | 63.6 |
| <b>Ethnicity</b> |                                     |   |      |
|                  | <b>White</b>                        | 9 | 81.8 |
|                  | <b>Mixed/multiple ethnic groups</b> | 1 | 9.1  |
|                  | <b>Other</b>                        | 1 | 9.1  |

---

### Overall impressions on the safety protocol

All respondents were positively impressed with the safety protocol. They agreed that it was feasible, efficient and straightforward, and they could not identify major drawbacks.

“I was really impressed. It was cheap. It was easy. ... It worked really well, I was very pleased with it from start to finish. And at the time I thought it was a great idea. ... I can't think of a drawback from the testing process.” (P7, age 55)

For many respondents, this was the first event they were able to attend since the beginning of the COVID-19 pandemic, and therefore found this procedure acceptable for the festival to take place. None of the participants reported concerns regarding the intrusiveness of the test or the way personal data was handled. Respondents agreed that the cost of the test was marginal with respect to the overall price of the ticket, and therefore accessible, even for families or large group bookings. Some participants in the older age groups feared to experience technological difficulties while carrying out the videoed test. Nevertheless, they were willing to do it and were able to successfully complete the procedure.

Although the safety protocol implied that videoed self-tests were reviewed by a professional, one respondent had doubts that all videos were being checked, given the large amount of festival attendees and the short time window between the test submission and the start of the festival. However, another respondent believed that there was someone manually checking the videos given that test results were not made available immediately.

“The fact that you had to give it in, but the time scales were such that you wouldn't necessarily get replies at certain points made me believe that there was a real person watching them all. ... And that gave me a reassurance.” (P2, age 53)

We asked participants about the impact of videoed testing on their confidence in self-testing. The majority did not notice any change in confidence in their self-testing technique

1  
2  
3 after carrying out a videoed test, since they were used to testing regularly before attending  
4 the event. However, one respondent said that the videoed aspect of it might have had a  
5 positive impact on her self-testing technique:  
6

7 “The animation person was doing it and then you kind of follow, so you know you're  
8 doing the right thing and it probably did influence my tests afterwards because I'd  
9 seen that and it was in my memory.” (P3, age 28)  
10

### 11 12 **Experience at the event**

13 Respondents believed that the protocol helped to minimise the spread of COVID-19. This  
14 contributed to create a feeling of safety and reassurance among participants at the event.

15 “I was very aware of the fact that nothing was going to stop a certain amount of  
16 infections taking place, but it minimized, and that to me was the main point. ... I  
17 felt much safer there, I felt much happier.” (P1, age 57)  
18  
19

20  
21 Several respondents stressed that they felt safer at the event knowing that everybody  
22 had been tested and that the protocol implied people had to strictly follow a set of  
23 instructions to be able to attend the event.

24 “The general belief and understanding that this was a COVID free zone was partly  
25 reinforced by the fact that I believe that everyone had been properly screened and  
26 proven to be COVID free within the days before entering the venue, and the  
27 videoed testing supported that.” (P7, age 55)  
28  
29  
30

31  
32 Some respondents attributed the added sense of safety to the robustness to videoed  
33 testing, which to many seemed harder to forge compared to other testing protocols, for  
34 example those that require to upload a picture of the test result.  
35  
36

37  
38 When asked about other preventive measures against COVID-19 adopted at the event,  
39 most respondents agreed that it did not feel necessary to wear a mask or to socially  
40 distance given that everyone had been tested, and that the event was outdoors. However,  
41 they all reported using hand sanitiser throughout the festival.  
42  
43

### 44 **General views on pre-event safety procedures and medically certified home-based** 45 **testing**

46 We asked respondents whether they would recommend this safety protocol for future  
47 events. While the majority agreed that videoed testing was very relevant at the time of  
48 SCF, they thought it may not be as necessary moving forward, given the difference of the  
49 current circumstances compared to last Summer, including the availability of vaccines  
50 and the increased frequency in self-testing among the general population.  
51

52 “I thought it's perfect for last Summer, but ... I think we're way past now this kind  
53 of filming people to do an LFT ... Last summer we didn't really understand the  
54  
55  
56  
57  
58  
59



disease to the same way that we do now, and loads of people weren't vaccinated. Now, everyone has had the opportunity to be vaccinated. ... I don't feel like we should be protecting people to the same extent because people should be protecting themselves.” (P9, age 46)

Participants were also asked whether they would find it useful to receive a personalised COVID-19 risk score before attending an event, calculated based on their vaccine status, that of other attendees, and the characteristics of the venue. While some would find it useful, the majority thought that a high-risk score would not stop them from going to an event. This may be because people would have taken other precautions or made their own considerations about the consequences and losses involved.

We asked respondents about their views on the potential of medically certified home-based testing for other diseases, such as flu, diabetes or HIV. The majority of respondents agreed that home-based testing could be useful, as long as tests are easy to carry out and people have the right skills and confidence to do them.

“I think home testing is a wonderful step forward. ... Most people would really appreciate being able to do those things at home ... as long as it's an easy process and you have confidence in the process and confidence in your ability to do it so that the result is accurate.” (P1, age 57)

Other participants stressed that having the opportunity to test for everything may become excessive and lead to negative consequences, resulting in people not taking sufficient responsibility, ignoring social norms, and even in the worsening of health outcomes.

“I think also there's the danger of promoting a false sense of security through test for too many things, so people then take no notice of the normal nor the social norms. Another thing that reduced the rate of flu last winter was the fact that we were socially isolating, washing our hands and doing all the other things, so you know perhaps it's almost a reason for not testing for flu, you know, make sure that people take responsibility.” (P10, age 71)

## Discussion

The aim of our study was to explore the views and perceptions of individuals who attended SCF in July 2021 in relation to the safety protocol that was implemented to minimise transmission of COVID-19 at the event. Our findings show that the protocol was highly acceptable, accessible, feasible, and reliable. Participants agreed that videoed testing was straightforward, not intrusive, and inexpensive, and it did not negatively impact their experience at the event. Videoed testing was helpful to improve the ability to self-test, and increased confidence in test results. Additionally, by interviewing a subgroup of

1  
2  
3 survey respondents we found that participants felt safe at the event knowing that  
4 everyone had followed a robust testing protocol that contributed to minimise the spread  
5 of COVID-19, and did not feel it was necessary to follow additional safety measures at  
6 the event such as social distancing or mask wearing. Some respondents mentioned that  
7 although videoed testing was very relevant at the time of SCF, it may not be as necessary  
8 for future events given significant improvements in the COVID-19 pandemic in the UK  
9 since last Summer. Participants also reported that having access to personalised risk  
10 scores would not extensively influence their decision to attend an event. Most  
11 respondents agreed that medically certified home-based testing has the potential to be  
12 used for other diseases if tests are easy to carry out and patients feel confident enough  
13 to do and interpret them. However, the ability to test excessively might negatively impact  
14 individual responsibility and people's respect of social norms.  
15  
16  
17  
18  
19

20 Home-based self-testing is widely used in healthcare. Studies have shown that self-  
21 testing for chronic disease management, such as diabetes, or diagnostics, such as HIV,  
22 is highly accepted among patients. Most patients can easily perform these tests, obtain  
23 accurate results, and correctly interpret them [11-14]. There are several advantages  
24 associated with home-based self-testing, including reduced costs of care, increased  
25 availability and uptake, and patient empowerment [13, 15]. Concerns with self-testing are  
26 often associated with user errors in performance or interpretation of results, leading  
27 patients to report the wrong outcome and change their behaviour accordingly [12, 14, 16].  
28 This can be avoided by ensuring that self-tests are simple and easy to use, and that  
29 patients are provided with better instructions to carry out and interpret tests correctly [17].  
30 Our findings show that professionally witnessed home-based videoed testing is feasible  
31 and reliable and has potential to be implemented in other health spheres to increase  
32 confidence among patients in disease self-management and further support correct  
33 interpretation of results.  
34  
35  
36  
37  
38  
39

40 Although the majority of respondents believed that the CAPACITY protocol was very  
41 relevant at the time of SCF, it may not be as useful for the current UK context given that,  
42 at the time of writing, all restrictions in relation to COVID-19 are close to being lifted [18].  
43 However, this safety protocol may be relevant in countries where the live event industry  
44 has been heavily affected by the recent rise in COVID-19 infections associated with the  
45 Omicron variant. For example, several live events have been cancelled in Australia [19],  
46 while in New Zealand they are currently capped at 100 people, who have to prove they  
47 have been vaccinated in order to gain entry to the event [20]. In these contexts, the  
48 CAPACITY protocol may be a useful strategy to support the safe reopening of live mass  
49 events at full capacity, while minimising transmission of COVID-19.  
50  
51  
52  
53

## 54 **Limitations**

55  
56  
57  
58  
59  
60



1  
2  
3 Our study was the first to evaluate the feasibility and acceptability of a safety protocol that  
4 involves professionally witnessed home-based videoed pre-event testing to minimise  
5 COVID-19 transmission and support the safe reopening of live mass events at full  
6 capacity. Our findings, however, have some limitations. The survey and interviews were  
7 conducted several months after the event took place, therefore the study may be subject  
8 to recall bias. Although our study sample was largely representative of the event  
9 population, interviewees were a small, self-selected subset of survey respondents. It is  
10 plausible that individuals who agreed to be interviewed may have had greater awareness  
11 of and interest in the research topic compared with those who did not participate, which  
12 may be an indication of selection bias. However, interviews were transcribed and coded  
13 to maintain reliability. Further, the way in which participants responded to the safety  
14 protocol may have been influenced by the audience composition, given that SCF is a  
15 family-friendly, boutique festival. Lastly, although the risk modelling successfully  
16 predicted the number of COVID-19 cases arising from the event in real-time as measured  
17 by Test and Trace, we were unable to evaluate the utility of risk-modelling as a go/no-go  
18 decision tool because it was a fast-moving environment and the event had already been  
19 given permission to go ahead. However, operationally the modelling was possible and  
20 has potential to support decision making at future events.  
21  
22  
23  
24  
25  
26  
27

## 28 **Conclusion**

29 Our study has shown that a safety protocol involving professionally witnessed home-  
30 based videoed pre-event testing for COVID-19 can support the safe reopening of live  
31 mass events at full capacity and is highly acceptable and feasible. While it may not  
32 necessarily be relevant for the current UK context, it can be useful for other countries  
33 where live events are currently suspended or are taking place at reduced capacity due to  
34 high numbers of COVID-19 infections. Risk modelling has the potential to further increase  
35 the robustness of this protocol and should be tested and evaluated at future events.  
36  
37  
38  
39

---

## 40 **Ethics**

41 The study received ethical approval from the Imperial College London Ethics Committee  
42 (ICREC 21IC6705). The survey was anonymous, and respondents were not asked to  
43 provide personal details unless they voluntarily expressed to be contacted for a follow-up  
44 interview. Participants were asked to give written and oral consent before the start of  
45 interviews. Participants were free to withdraw from the survey or interview at any time  
46 however a lottery to receive free tickets to the 2022 SCF was provided by the event  
47 organisers as an inducement for ticket holders to participate in the evaluation. Interview  
48 data was pseudonymised. The interviews were transcribed with the principle of anonymity  
49 in mind and transcriptions were not outsourced, therefore no confidentiality agreements  
50 were required. All data generated or analysed during this study are included in this  
51 published article.  
52  
53  
54  
55  
56  
57  
58  
59  
60

## Consent

Consent to enter the study was sought from each participant only after a full explanation of the study was given, documentation was offered, and time allowed for consideration. The right of the participant to refuse to participate without giving reasons was respected. All participants were free to withdraw at any time and without giving reasons. Participants were notified on the plans for publication and were reminded that all their data was pseudonymised.

## Funding

This research received no specific grant from any funding agency in the public, commercial or not-for-profit sectors. MH, GD, AA and AEO are in part supported by the National Institute for Health Research (NIHR) Applied Research Collaboration (ARC) Northwest London. The views expressed are those of the authors and not necessarily those of the NHS or the NIHR or the Department of Health and Social Care.

**Author Contributions:** All authors provided substantial contributions to the conception design, acquisition and interpretation of study data and approved the final version of the paper. MH, AEO and JK took the lead in planning the study with support from co-authors. GD and AA carried out interviews and data analysis, with support from MH, AEO and JK. MH is the guarantor.

**Data sharing statement:** No further data are available.

**Competing interests:** JK is currently Director of Health Optimisation at the Center for Health and Human Performance (London, UK), and co-founder and Medical Director of CERTIFIC.

## Acknowledgments

MH, AA, GD and AEO are supported in part by the Northwest London NIHR Applied Research Collaboration. Imperial College London is grateful for support from the NW London NIHR Applied Research Collaboration and the Imperial NIHR Biomedical Research Centre.

## Disclaimer

The views expressed in this publication are those of the authors and not necessarily those of the NIHR or the Department of Health and Social Care.

---

# References

1. Harris M, Kreindler J, El-Osta A, Esko T, Majeed A: Safe management of full-capacity live/mass events in COVID-19 will require mathematical, epidemiological and economic modelling. *J R Soc Med.* 2021; 114(6):290-294.
2. Drury J, Rogers MB, Marteau TM, Yardley L, Reicher S, Stott C: Re-opening live events and large venues after Covid-19 'lockdown': Behavioural risks and their mitigations. *Safety Science.* 2021; 139:105243.
3. GOV.UK. Information on the Events Research Programme. Available from: <https://www.gov.uk/government/publications/information-on-the-events-research-programme/information-on-the-events-research-programme> [Accessed 15<sup>th</sup> February 2022].
4. GOV.UK. Events Research Programme (ERP) - Capping summary. Available from: <https://www.gov.uk/government/publications/events-research-programme-phase-ii-and-iii-findings/event-research-programme-erp-capping-summary> [Accessed 15<sup>th</sup> February 2022].
5. Donnat C, Bunbury F, Kreindler J, Liu D, Filippidis FT, Esko T, El-Osta A, Harris M: Predicting COVID-19 Transmission to Inform the Management of Mass Events: Model-Based Approach. *JMIR Public Health Surveill.* 2021; 7(12):e30648.
6. Sleat D, Innes K, Parker I: Are vaccine passports and covid passes a valid alternative to lockdown? *BMJ.* 2021; 375:n2571.
7. BBC News. Standon Calling: Hertfordshire festival confirmed to take place in July. *BBC News.* Jun 29 2021. Available from: <https://www.bbc.co.uk/news/uk-england-beds-bucks-herts-57654584> [Accessed 15<sup>th</sup> February 2022].
8. Standon Calling. June 2021 statement. Available from: <https://standon-calling.com/2021/06/june-2021-statement/> [Accessed 15<sup>th</sup> February 2022].
9. Tariq S, Woodman J: Using mixed methods in health research. *JRSM Short Rep.* 2013; 4(6):2042533313479197.
10. Eysenbach G: Improving the quality of Web surveys: the Checklist for Reporting Results of Internet E-Surveys (CHERRIES). *J Med Internet Res.* 2004; 6(3):e34-e34.
11. Ibitoye M, Frasca T, Giguere R, Carballo-Dieguez A: Home testing past, present and future: lessons learned and implications for HIV home tests. *AIDS Behav.* 2014; 18(5):933-949.
12. Figueroa C, Johnson C, Ford N, Sands A, Dalal S, Meurant R, Prat I, Hatzold K, Urassa W, Baggaley R: Reliability of HIV rapid diagnostic tests for self-testing compared with testing by health-care workers: a systematic review and meta-analysis. *Lancet HIV.* 2018; 5(6):e277-e290.
13. Tidy EJ, Shine B, Oke J, Hayward G: Home self-testing kits: helpful or harmful? *Br J Gen Pract.* 2018; 68(673):360-361.

14. Atchison C, Pristerà P, Cooper E, Papageorgiou V, Redd R, Piggim M, Flower B, Fontana G, Satkunarajah S, Ashrafian H et al: Usability and Acceptability of Home-based Self-testing for Severe Acute Respiratory Syndrome Coronavirus 2 (SARS-CoV-2) Antibodies for Population Surveillance. *Clin Infect Dis*. 2021; 72(9):e384-e393.
15. O’Kane MJ: Patient self-testing in chronic disease management. *Journal of Laboratory Medicine*. 2020; 44(2):81-87.
16. Erbach M, Freckmann G, Hinzmann R, Kulzer B, Ziegler R, Heinemann L, Schnell O: Interferences and Limitations in Blood Glucose Self-Testing: An Overview of the Current Knowledge. *J Diabetes Sci Technol*. 2016; 10(5):1161-1168.
17. Tonen-Wolyec S, Batina-Agasa S, Muwonga J, Mboumba Bouassa R-S, Kayembe Tshilumba C, Bélec L: Acceptability, feasibility, and individual preferences of blood-based HIV self-testing in a population-based sample of adolescents in Kisangani, Democratic Republic of the Congo. *PLoS One*. 2019; 14(7):e0218795-e0218795.
18. Gillett F, Lee J. Covid: Self-isolation law could be scrapped in England this month. *BBC News*. Feb 10 2022. Available from: <https://www.bbc.co.uk/news/uk-60319947> [Accessed 15<sup>th</sup> February 2022].
19. Proust K, Doak E. COVID-19 puts future of live music in doubt as more events are cancelled, but hope is left for some. *ABC News*. Jan 12 2022. Available from: <https://www.abc.net.au/news/2022-01-12/music-festivals-cancelled-as-nsw-grapples-with-covid/100748410> [Accessed 15th February 2022].
20. Covid19.govt.nz. Events at Red. Available from: <https://covid19.govt.nz/traffic-lights/life-at-red/events-and-public-facilities-at-red/events-at-red/> [Accessed 15<sup>th</sup> February 2022].

## Figure legends

**Figure 1:** percentage of respondents who agreed or disagreed with various statements about videoed pre-event COVID-19 testing, safety and experience (n=1,093).

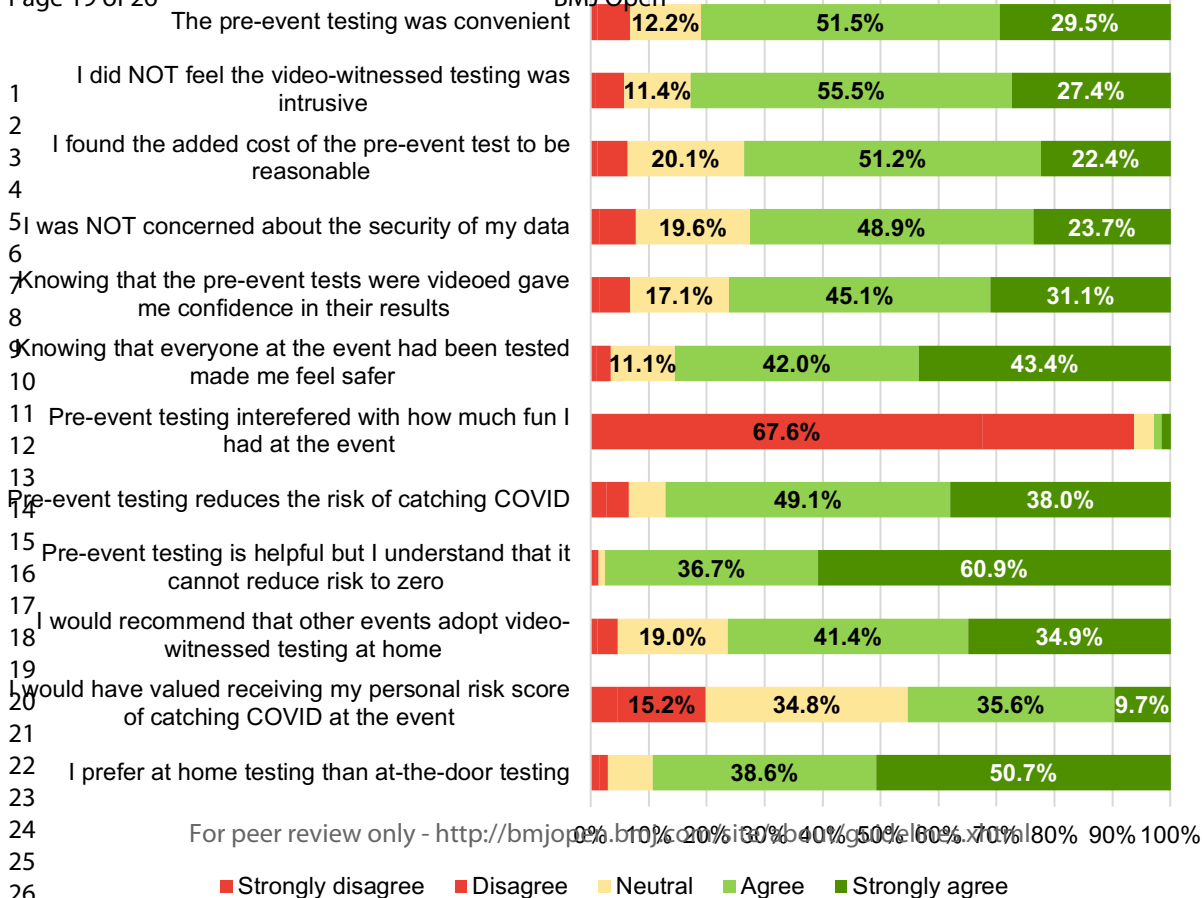

For peer review only - <http://bmjopen.bmj.com/>

Strongly disagree Disagree Neutral Agree Strongly agree

# Supplemental material

Supplemental Table S1: survey results.

|                                                                                                                                                                        | N    | %     |
|------------------------------------------------------------------------------------------------------------------------------------------------------------------------|------|-------|
| <b>Total</b>                                                                                                                                                           | 1093 | 100.0 |
| <b>How confident do you feel to correctly complete the LFT yourself or on others in the future after completing videoed testing on the CERTIFIC App or Web portal?</b> |      |       |
| Very confident - the app has made me more confident to self-test correctly                                                                                             | 492  | 45.0  |
| No difference - this was exactly the same as what I always did                                                                                                         | 598  | 54.7  |
| Not confident - I am still not confident to self-test correctly                                                                                                        | 3    | 0.3   |
| <b>To what extent do you agree or disagree with the following statements?</b>                                                                                          |      |       |
| <b><i>Pre-event testing reduces the risk of catching COVID</i></b>                                                                                                     |      |       |
| Strongly disagree                                                                                                                                                      | 31   | 2.8   |
| Disagree                                                                                                                                                               | 42   | 3.8   |
| Neutral                                                                                                                                                                | 70   | 6.4   |
| Agree                                                                                                                                                                  | 536  | 49.0  |
| Strongly agree                                                                                                                                                         | 415  | 38.0  |
| <b><i>The pre-event testing with CERTIFIC was convenient</i></b>                                                                                                       |      |       |
| Strongly disagree                                                                                                                                                      | 12   | 1.1   |
| Disagree                                                                                                                                                               | 62   | 5.7   |
| Neutral                                                                                                                                                                | 133  | 12.2  |
| Agree                                                                                                                                                                  | 563  | 51.5  |
| Strongly agree                                                                                                                                                         | 322  | 29.5  |
| <b><i>I prefer home based testing than at-the-door testing</i></b>                                                                                                     |      |       |
| Strongly disagree                                                                                                                                                      | 16   | 1.5   |
| Disagree                                                                                                                                                               | 16   | 1.5   |
| Neutral                                                                                                                                                                | 84   | 7.7   |
| Agree                                                                                                                                                                  | 422  | 38.6  |
| Strongly agree                                                                                                                                                         | 554  | 50.7  |
| <b><i>Knowing that everyone at the event had been tested made me feel safer</i></b>                                                                                    |      |       |
| Strongly disagree                                                                                                                                                      | 11   | 1.0   |
| Disagree                                                                                                                                                               | 26   | 2.4   |
| Neutral                                                                                                                                                                | 121  | 11.1  |
| Agree                                                                                                                                                                  | 460  | 42.1  |
| Strongly agree                                                                                                                                                         | 474  | 43.4  |
| <b><i>Pre-event testing is helpful but I understand that it cannot reduce risk to zero</i></b>                                                                         |      |       |
| Strongly disagree                                                                                                                                                      | 8    | 0.7   |
| Disagree                                                                                                                                                               | 7    | 0.6   |
| Neutral                                                                                                                                                                | 13   | 1.2   |
| Agree                                                                                                                                                                  | 401  | 36.7  |
| Strongly agree                                                                                                                                                         | 665  | 60.8  |
| <b><i>Knowing that the pre-event tests were videoed gave me confidence in their results</i></b>                                                                        |      |       |

|    |                                                                                                   |      |      |
|----|---------------------------------------------------------------------------------------------------|------|------|
| 1  |                                                                                                   |      |      |
| 2  |                                                                                                   |      |      |
| 3  | <b>Strongly disagree</b>                                                                          | 16   | 1.5  |
| 4  | <b>Disagree</b>                                                                                   | 57   | 5.2  |
| 5  | <b>Neutral</b>                                                                                    | 187  | 17.1 |
| 6  | <b>Agree</b>                                                                                      | 493  | 45.1 |
| 7  | <b>Strongly agree</b>                                                                             | 340  | 31.1 |
| 8  |                                                                                                   |      |      |
| 9  | <b><i>Pre-event testing interfered with how much fun I had at the event</i></b>                   |      |      |
| 10 | <b>Strongly disagree</b>                                                                          | 739  | 67.6 |
| 11 | <b>Disagree</b>                                                                                   | 285  | 26.1 |
| 12 | <b>Neutral</b>                                                                                    | 38   | 3.5  |
| 13 | <b>Agree</b>                                                                                      | 14   | 1.3  |
| 14 | <b>Strongly agree</b>                                                                             | 16   | 1.5  |
| 15 |                                                                                                   |      |      |
| 16 | <b><i>I would recommend that other events adopt video-witnessed testing at home</i></b>           |      |      |
| 17 | <b>Strongly disagree</b>                                                                          | 12   | 1.1  |
| 18 | <b>Disagree</b>                                                                                   | 39   | 3.6  |
| 19 | <b>Neutral</b>                                                                                    | 208  | 19.0 |
| 20 | <b>Agree</b>                                                                                      | 453  | 41.4 |
| 21 | <b>Strongly agree</b>                                                                             | 381  | 34.9 |
| 22 |                                                                                                   |      |      |
| 23 | <b><i>I found the added cost of the pre-event test to be reasonable</i></b>                       |      |      |
| 24 | <b>Strongly disagree</b>                                                                          | 12   | 1.1  |
| 25 | <b>Disagree</b>                                                                                   | 57   | 5.2  |
| 26 | <b>Neutral</b>                                                                                    | 220  | 20.1 |
| 27 | <b>Agree</b>                                                                                      | 560  | 51.2 |
| 28 | <b>Strongly agree</b>                                                                             | 245  | 22.4 |
| 29 |                                                                                                   |      |      |
| 30 | <b><i>I was NOT concerned about the security of my data</i></b>                                   |      |      |
| 31 | <b>Strongly disagree</b>                                                                          | 16   | 1.5  |
| 32 | <b>Disagree</b>                                                                                   | 69   | 6.3  |
| 33 | <b>Neutral</b>                                                                                    | 214  | 19.6 |
| 34 | <b>Agree</b>                                                                                      | 534  | 48.9 |
| 35 | <b>Strongly agree</b>                                                                             | 259  | 23.7 |
| 36 |                                                                                                   |      |      |
| 37 | <b><i>I did NOT feel the video-witnessed testing was intrusive</i></b>                            |      |      |
| 38 | <b>Strongly disagree</b>                                                                          | 8    | 0.7  |
| 39 | <b>Disagree</b>                                                                                   | 56   | 5.1  |
| 40 | <b>Neutral</b>                                                                                    | 125  | 11.4 |
| 41 | <b>Agree</b>                                                                                      | 607  | 55.5 |
| 42 | <b>Strongly agree</b>                                                                             | 298  | 27.3 |
| 43 |                                                                                                   |      |      |
| 44 | <b><i>I would have valued receiving my personal risk score of catching COVID at the event</i></b> |      |      |
| 45 | <b>Strongly disagree</b>                                                                          | 49   | 4.5  |
| 46 | <b>Disagree</b>                                                                                   | 165  | 15.1 |
| 47 | <b>Neutral</b>                                                                                    | 380  | 34.8 |
| 48 | <b>Agree</b>                                                                                      | 393  | 36.0 |
| 49 | <b>Strongly agree</b>                                                                             | 105  | 9.6  |
| 50 |                                                                                                   |      |      |
| 51 | <b>Have you tested positive for COVID since attending Standon Calling?</b>                        |      |      |
| 52 | <b>No – I did not test positive for COVID within the first 2 weeks of participating in SCF</b>    | 1055 | 96.5 |
| 53 |                                                                                                   |      |      |
| 54 |                                                                                                   |      |      |
| 55 |                                                                                                   |      |      |
| 56 |                                                                                                   |      |      |
| 57 |                                                                                                   |      |      |
| 58 |                                                                                                   |      |      |
| 59 |                                                                                                   |      |      |
| 60 |                                                                                                   |      |      |



|    |                                                                                                       |      |      |
|----|-------------------------------------------------------------------------------------------------------|------|------|
| 1  |                                                                                                       |      |      |
| 2  |                                                                                                       |      |      |
| 3  | Yes – I tested positive for COVID within 2 weeks of                                                   |      |      |
| 4  | participating in SCF                                                                                  | 38   | 3.5  |
| 5  | <b>How did you access the CERTIFIC platform?</b>                                                      |      |      |
| 6  | App for Apple (iOS)                                                                                   | 709  | 64.9 |
| 7  | App for Android/Google                                                                                | 303  | 27.7 |
| 8  | Web-based                                                                                             | 80   | 7.3  |
| 9  | Other                                                                                                 | 1    | 0.1  |
| 10 |                                                                                                       |      |      |
| 11 | <b>Please tell us your views about using the CERTIFIC App (please tick all that apply)</b>            |      |      |
| 12 | The app was relatively easy to use                                                                    | 987  | 90.3 |
| 13 | The procedure was not very time consuming                                                             | 648  | 59.3 |
| 14 | I felt my data was safeguarded                                                                        | 399  | 36.5 |
| 15 | I still have the app on my phone                                                                      | 387  | 35.4 |
| 16 | I would recommend using the CERTIFIC app for this purpose                                             |      |      |
| 17 | to my friends and family                                                                              | 565  | 51.7 |
| 18 |                                                                                                       |      |      |
| 19 | <b>To what extent did you wear a mask, maintained social distancing and/or washed your hands</b>      |      |      |
| 20 | <b>during the event?</b>                                                                              |      |      |
| 21 | <i>I consistently wore a face mask/face covering</i>                                                  |      |      |
| 22 | Not at all                                                                                            | 598  | 54.7 |
| 23 | Not really                                                                                            | 228  | 20.9 |
| 24 | To some extent                                                                                        | 225  | 20.6 |
| 25 | Yes, mostly                                                                                           | 42   | 3.8  |
| 26 |                                                                                                       |      |      |
| 27 | <i>I maintained social distancing</i>                                                                 |      |      |
| 28 | Not at all                                                                                            | 322  | 29.5 |
| 29 | Not really                                                                                            | 317  | 29.0 |
| 30 | To some extent                                                                                        | 365  | 33.4 |
| 31 | Yes, mostly                                                                                           | 89   | 8.1  |
| 32 |                                                                                                       |      |      |
| 33 | <i>I maintained regular hand washing</i>                                                              |      |      |
| 34 | Not at all                                                                                            | 47   | 4.3  |
| 35 | Not really                                                                                            | 128  | 11.7 |
| 36 | To some extent                                                                                        | 359  | 32.8 |
| 37 | Yes, mostly                                                                                           | 560  | 51.2 |
| 38 |                                                                                                       |      |      |
| 39 | <b>How many people (other than yourself) did you attend the event with?</b>                           |      |      |
| 40 | I went alone                                                                                          | 9    | 0.8  |
| 41 | +1                                                                                                    | 203  | 18.6 |
| 42 | +2                                                                                                    | 107  | 9.8  |
| 43 | +3 or more                                                                                            | 774  | 70.8 |
| 44 |                                                                                                       |      |      |
| 45 | <b>If at-home, videoed, rapid testing is required to be completed in a similar fashion for future</b> |      |      |
| 46 | <b>events, would you still attend those events?</b>                                                   |      |      |
| 47 | Yes – it makes no difference to my decision to attend                                                 | 1023 | 93.6 |
| 48 | Unsure if it will influence my decision to attend                                                     | 67   | 6.1  |
| 49 | No – I will not sign up to attend future events if rapid testing                                      |      |      |
| 50 | was required                                                                                          | 3    | 0.3  |
| 51 |                                                                                                       |      |      |



### Checklist for Reporting Results of Internet E-Surveys (CHERRIES)

| <b>Checklist Item</b>                    | <b>Explanation</b>                                                                                                                                                                                                                                                                                                                                                                                                                                                           | <b>Page Number</b> |
|------------------------------------------|------------------------------------------------------------------------------------------------------------------------------------------------------------------------------------------------------------------------------------------------------------------------------------------------------------------------------------------------------------------------------------------------------------------------------------------------------------------------------|--------------------|
| Describe survey design                   | A total of 1,093 participants completed the survey out of the 4,726 that were contacted (response rate 23.1%).                                                                                                                                                                                                                                                                                                                                                               | 7                  |
| IRB approval                             | The study received ethical approval from the Imperial College London Ethics Committee (ICREC 211C6705).                                                                                                                                                                                                                                                                                                                                                                      | 7                  |
| Informed consent                         | Consent to enter the study was sought from each participant only after a full explanation of the study was given, documentation was offered, and time allowed for consideration. The right of the participant to refuse to participate without giving reasons was respected. All participants were free to withdraw at any time and without giving reasons. Participants were notified on the plans for publication and were reminded that all their data was pseudonymised. | 15                 |
| Data protection                          | All data was stored on a password encrypted database which only the study team had access to.                                                                                                                                                                                                                                                                                                                                                                                | 6                  |
| Development and testing                  | Members of the study team beta-tested the survey for usability and technical functionality of the electronic questionnaire before fielding the questionnaire.                                                                                                                                                                                                                                                                                                                | 5                  |
| Open survey versus closed survey         | The online survey comprised of 17 total items organised in five different blocks.                                                                                                                                                                                                                                                                                                                                                                                            | 6                  |
| Contact mode                             | Adults who attended SCF in July 2021 and gave permission to be contacted by the research team during ticket purchase were eligible to participate in the survey and were contacted via email.                                                                                                                                                                                                                                                                                | 5                  |
| Advertising the survey                   | NA                                                                                                                                                                                                                                                                                                                                                                                                                                                                           | NA                 |
| Web/E-mail                               | The online survey comprised of 17 total items organised in five different blocks.                                                                                                                                                                                                                                                                                                                                                                                            | 6                  |
| Context                                  | The survey was distributed via web-link on the Qualtrics platform.                                                                                                                                                                                                                                                                                                                                                                                                           | 5                  |
| Mandatory/voluntary                      | The survey was voluntary, and participants were free to decide whether they wanted to take part.                                                                                                                                                                                                                                                                                                                                                                             | 5                  |
| Incentives                               | NA                                                                                                                                                                                                                                                                                                                                                                                                                                                                           | NA                 |
| Time/Date                                | Participants were surveyed anonymously in the first two weeks of November 2021 through an online questionnaire to capture their views and experiences regarding SCF.                                                                                                                                                                                                                                                                                                         | 5                  |
| Randomization of items or questionnaires | NA                                                                                                                                                                                                                                                                                                                                                                                                                                                                           | NA                 |
| Adaptive questioning                     | NA                                                                                                                                                                                                                                                                                                                                                                                                                                                                           | NA                 |
| Number of Items                          | The online survey comprised of 17 total items organised in five different blocks.                                                                                                                                                                                                                                                                                                                                                                                            | 6                  |

|                                                                                                           |                                                                                          |    |
|-----------------------------------------------------------------------------------------------------------|------------------------------------------------------------------------------------------|----|
| Number of screens (pages)                                                                                 | NA                                                                                       | NA |
| Completeness check                                                                                        | NA                                                                                       | NA |
| Review step                                                                                               | Participants were free to change their answers until the point of submitting the survey. | 6  |
| Unique site visitor                                                                                       | NA                                                                                       | NA |
| View rate (Ratio of unique survey visitors/unique site visitors)                                          | NA                                                                                       | NA |
| Participation rate (Ratio of unique visitors who agreed to participate/unique first survey page visitors) | NA                                                                                       | NA |
| Completion rate (Ratio of users who finished the survey/users who agreed to participate)                  | NA                                                                                       | NA |
| Cookies used                                                                                              | NA                                                                                       | NA |
| IP check                                                                                                  | NA                                                                                       | NA |
| Log file analysis                                                                                         | NA                                                                                       | NA |
| Registration                                                                                              | NA                                                                                       | NA |
| Handling of incomplete questionnaires                                                                     | NA                                                                                       | NA |
| Questionnaires submitted with an atypical timestamp                                                       | NA                                                                                       | NA |
| Statistical correction                                                                                    | NA                                                                                       | NA |

This checklist has been modified from Eysenbach G. Improving the quality of Web surveys: the Checklist for Reporting Results of Internet E-Surveys (CHERRIES). J Med Internet Res. 2004 Sep 29;6(3):e34 [erratum in J Med Internet Res. 2012; 14(1): e8.]. Article available at <https://www.jmir.org/2004/3/e34/>; erratum available <https://www.jmir.org/2012/1/e8/>. Copyright ©Gunther Eysenbach. Originally published in the [Journal of Medical Internet Research](#), 29.9.2004 and 04.01.2012.

1  
2  
3  
4  
5  
6  
7  
8  
9  
10  
11  
12  
13  
14  
15  
16  
17  
18  
19  
20  
21  
22  
23  
24  
25  
26  
27  
28  
29  
30  
31  
32  
33  
34  
35  
36  
37  
38  
39  
40  
41  
42  
43  
44  
45  
46

This is an open-access article distributed under the terms of the Creative Commons Attribution License (<https://creativecommons.org/licenses/by/2.0/>), which permits unrestricted use, distribution, and reproduction in any medium, provided the original work, first published in the Journal of Medical Internet Research, is properly cited.

For peer review only

## COREQ (CONsolidated criteria for REporting Qualitative research) Checklist

A checklist of items that should be included in reports of qualitative research. You must report the page number in your manuscript where you consider each of the items listed in this checklist. If you have not included this information, either revise your manuscript accordingly before submitting or note N/A.

| Topic                                          | Item No. | Guide Questions/Description                                                                                                                              | Reported on Page No. |
|------------------------------------------------|----------|----------------------------------------------------------------------------------------------------------------------------------------------------------|----------------------|
| <b>Domain 1: Research team and reflexivity</b> |          |                                                                                                                                                          |                      |
| <i>Personal characteristics</i>                |          |                                                                                                                                                          |                      |
| Interviewer/facilitator                        | 1        | Which author/s conducted the interview or focus group?                                                                                                   |                      |
| Credentials                                    | 2        | What were the researcher's credentials? E.g. PhD, MD                                                                                                     |                      |
| Occupation                                     | 3        | What was their occupation at the time of the study?                                                                                                      |                      |
| Gender                                         | 4        | Was the researcher male or female?                                                                                                                       |                      |
| Experience and training                        | 5        | What experience or training did the researcher have?                                                                                                     |                      |
| <i>Relationship with participants</i>          |          |                                                                                                                                                          |                      |
| Relationship established                       | 6        | Was a relationship established prior to study commencement?                                                                                              |                      |
| Participant knowledge of the interviewer       | 7        | What did the participants know about the researcher? e.g. personal goals, reasons for doing the research                                                 |                      |
| Interviewer characteristics                    | 8        | What characteristics were reported about the interviewer/facilitator? e.g. Bias, assumptions, reasons and interests in the research topic                |                      |
| <b>Domain 2: Study design</b>                  |          |                                                                                                                                                          |                      |
| <i>Theoretical framework</i>                   |          |                                                                                                                                                          |                      |
| Methodological orientation and Theory          | 9        | What methodological orientation was stated to underpin the study? e.g. grounded theory, discourse analysis, ethnography, phenomenology, content analysis |                      |
| <i>Participant selection</i>                   |          |                                                                                                                                                          |                      |
| Sampling                                       | 10       | How were participants selected? e.g. purposive, convenience, consecutive, snowball                                                                       |                      |
| Method of approach                             | 11       | How were participants approached? e.g. face-to-face, telephone, mail, email                                                                              |                      |
| Sample size                                    | 12       | How many participants were in the study?                                                                                                                 |                      |
| Non-participation                              | 13       | How many people refused to participate or dropped out? Reasons?                                                                                          |                      |
| <i>Setting</i>                                 |          |                                                                                                                                                          |                      |
| Setting of data collection                     | 14       | Where was the data collected? e.g. home, clinic, workplace                                                                                               |                      |
| Presence of non-participants                   | 15       | Was anyone else present besides the participants and researchers?                                                                                        |                      |
| Description of sample                          | 16       | What are the important characteristics of the sample? e.g. demographic data, date                                                                        |                      |
| <i>Data collection</i>                         |          |                                                                                                                                                          |                      |
| Interview guide                                | 17       | Were questions, prompts, guides provided by the authors? Was it pilot tested?                                                                            |                      |
| Repeat interviews                              | 18       | Were repeat interviews carried out? If yes, how many?                                                                                                    |                      |
| Audio/visual recording                         | 19       | Did the research use audio or visual recording to collect the data?                                                                                      |                      |
| Field notes                                    | 20       | Were field notes made during and/or after the interview or focus group?                                                                                  |                      |
| Duration                                       | 21       | What was the duration of the interviews or focus group?                                                                                                  |                      |
| Data saturation                                | 22       | Was data saturation discussed?                                                                                                                           |                      |
| Transcripts returned                           | 23       | Were transcripts returned to participants for comment and/or                                                                                             |                      |

| Topic                                  | Item No. | Guide Questions/Description                                                                                                        | Reported on Page No. |
|----------------------------------------|----------|------------------------------------------------------------------------------------------------------------------------------------|----------------------|
|                                        |          | correction?                                                                                                                        |                      |
| <b>Domain 3: analysis and findings</b> |          |                                                                                                                                    |                      |
| <i>Data analysis</i>                   |          |                                                                                                                                    |                      |
| Number of data coders                  | 24       | How many data coders coded the data?                                                                                               |                      |
| Description of the coding tree         | 25       | Did authors provide a description of the coding tree?                                                                              |                      |
| Derivation of themes                   | 26       | Were themes identified in advance or derived from the data?                                                                        |                      |
| Software                               | 27       | What software, if applicable, was used to manage the data?                                                                         |                      |
| Participant checking                   | 28       | Did participants provide feedback on the findings?                                                                                 |                      |
| <i>Reporting</i>                       |          |                                                                                                                                    |                      |
| Quotations presented                   | 29       | Were participant quotations presented to illustrate the themes/findings?<br>Was each quotation identified? e.g. participant number |                      |
| Data and findings consistent           | 30       | Was there consistency between the data presented and the findings?                                                                 |                      |
| Clarity of major themes                | 31       | Were major themes clearly presented in the findings?                                                                               |                      |
| Clarity of minor themes                | 32       | Is there a description of diverse cases or discussion of minor themes?                                                             |                      |

Developed from: Tong A, Sainsbury P, Craig J. Consolidated criteria for reporting qualitative research (COREQ): a 32-item checklist for interviews and focus groups. *International Journal for Quality in Health Care*. 2007. Volume 19, Number 6: pp. 349 – 357

**Once you have completed this checklist, please save a copy and upload it as part of your submission. DO NOT include this checklist as part of the main manuscript document. It must be uploaded as a separate file.**

# BMJ Open

## Evaluating the feasibility and acceptability of a safety protocol to mitigate SARS-CoV-2 transmission risks when participating in full-capacity live mass events: a cross-sectional survey and interview-based study

|                                 |                                                                                                                                                                                                                                                                                                                                                                                                                                                                                                   |
|---------------------------------|---------------------------------------------------------------------------------------------------------------------------------------------------------------------------------------------------------------------------------------------------------------------------------------------------------------------------------------------------------------------------------------------------------------------------------------------------------------------------------------------------|
| Journal:                        | <i>BMJ Open</i>                                                                                                                                                                                                                                                                                                                                                                                                                                                                                   |
| Manuscript ID                   | bmjopen-2022-063838.R1                                                                                                                                                                                                                                                                                                                                                                                                                                                                            |
| Article Type:                   | Original research                                                                                                                                                                                                                                                                                                                                                                                                                                                                                 |
| Date Submitted by the Author:   | 07-Dec-2022                                                                                                                                                                                                                                                                                                                                                                                                                                                                                       |
| Complete List of Authors:       | Dallera, Giulia; Imperial College London, Department of Primary Care and Public Health<br>Alaa, Aos; Imperial College London, Department of Primary Care and Public Health<br>El-Osta, Austen; Imperial College London, Department of Primary Care and Public Health<br>Kreindler, Jack; Imperial College London, Department of Primary Care and Public Health; Centre for Health and Human Performance<br>Harris, Matthew; Imperial College London, Department of Primary Care and Public Health |
| <b>Primary Subject Heading</b>: | Public health                                                                                                                                                                                                                                                                                                                                                                                                                                                                                     |
| Secondary Subject Heading:      | Epidemiology, Global health, Health informatics, Health services research, Qualitative research                                                                                                                                                                                                                                                                                                                                                                                                   |
| Keywords:                       | COVID-19, PUBLIC HEALTH, Infection control < INFECTIOUS DISEASES, Public health < INFECTIOUS DISEASES, Protocols & guidelines < HEALTH SERVICES ADMINISTRATION & MANAGEMENT, Risk management < HEALTH SERVICES ADMINISTRATION & MANAGEMENT                                                                                                                                                                                                                                                        |
|                                 |                                                                                                                                                                                                                                                                                                                                                                                                                                                                                                   |

SCHOLARONE™  
Manuscripts



I, the Submitting Author has the right to grant and does grant on behalf of all authors of the Work (as defined in the below author licence), an exclusive licence and/or a non-exclusive licence for contributions from authors who are: i) UK Crown employees; ii) where BMJ has agreed a CC-BY licence shall apply, and/or iii) in accordance with the terms applicable for US Federal Government officers or employees acting as part of their official duties; on a worldwide, perpetual, irrevocable, royalty-free basis to BMJ Publishing Group Ltd ("BMJ") its licensees and where the relevant Journal is co-owned by BMJ to the co-owners of the Journal, to publish the Work in this journal and any other BMJ products and to exploit all rights, as set out in our [licence](#).

The Submitting Author accepts and understands that any supply made under these terms is made by BMJ to the Submitting Author unless you are acting as an employee on behalf of your employer or a postgraduate student of an affiliated institution which is paying any applicable article publishing charge ("APC") for Open Access articles. Where the Submitting Author wishes to make the Work available on an Open Access basis (and intends to pay the relevant APC), the terms of reuse of such Open Access shall be governed by a Creative Commons licence – details of these licences and which [Creative Commons](#) licence will apply to this Work are set out in our licence referred to above.

Other than as permitted in any relevant BMJ Author's Self Archiving Policies, I confirm this Work has not been accepted for publication elsewhere, is not being considered for publication elsewhere and does not duplicate material already published. I confirm all authors consent to publication of this Work and authorise the granting of this licence.

# Evaluating the feasibility and acceptability of a safety protocol to mitigate SARS-CoV-2 transmission risks when participating in full-capacity live mass events: a cross-sectional survey and interview-based study

---

1. Giulia Dallera<sup>1\*</sup>
2. AOs Alaa<sup>1</sup>
3. Austen El-Osta<sup>1</sup>
4. Jack Kreindler<sup>1,2,3</sup>
5. Matthew Harris<sup>1</sup>

<sup>1</sup>Imperial College London, Department of Primary Care and Public Health

<sup>2</sup>CERTIFIC

<sup>3</sup>Centre for Health and Human Performance

\*Corresponding author: Matthew Harris, Department of Primary Care and Public Health, Imperial College London, Reynolds Building, Charing Cross Hospital, London W6 8RP  
Phone: 07890614005  
Email: [m.harris@imperial.ac.uk](mailto:m.harris@imperial.ac.uk)

**Word count:** 3998



# Abstract

**Objective:** Investigate the feasibility and acceptability of a novel COVID-19 safety protocol combining professionally witnessed home-based videoed pre-event testing and a data-driven risk assessment model that was piloted at the Standon Calling Festival in July 2021.

**Design:** Observational study using a sequential explanatory mixed-methods design involving a survey, personal interviews and group discussions with a cross section of participants.

**Setting:** Standon Calling Festival, Hertfordshire, England.

**Participants:** 4,726 adults who attended Standon Calling and consented to participate in the study.

**Results:** Nearly a quarter (23.1%; 1,093) attendees (Female 65%, Male 35%) responded to the post-event survey. Eleven participants were interviewed before thematic saturation was reached. The majority (81.0%) of respondents found the at-home testing protocol convenient and of reasonable cost (73.6%). Confidence in the test result was enhanced due to professional-supported videoing (76.2%) whereas 72.6% had confidence in the security of the data. Videoed self-testing helped 45.0% of respondents to feel more confident in their lateral flow testing technique. The majority (85.5%) felt safer at the event and 93.7% agreed that the protocol did not interfere with their enjoyment of the event. Themes generated from interviews showed that the protocol could be applied to other disease areas and events, but there were concerns that over-reliance on test results alone could lead some people to have a false sense of security around the safety of the live event.

**Conclusions:** Our study showed that a protocol that combines professionally witnessed home-based videoed pre-event testing is highly acceptable and feasible, and it can inform decision making and support the safe reopening of live mass events at full capacity. Although COVID-19 is now considered endemic in the UK, this protocol can be of value for other countries where the live events industry remains heavily impacted. Risk-modelling should be tested and evaluated at future events to further increase the robustness of this protocol.

**Key Words:** COVID-19; live events management; safety protocol; medically certified testing; risk mitigation.

## Strengths and limitations

- This was the first study evaluating the feasibility and acceptability of a COVID-19 safety protocol for the safe reopening of live mass events at full capacity.
- We used a sequential explanatory mixed-methods design, whereby quantitative findings from an online questionnaire informed the collection of contextual data from interviews and one focus group discussion.
- We surveyed 1,093 respondents who had attended the mass live event, and surfaced assumptions from 11 participants to explore barriers and drivers for routine adoption of witnessed rapid lateral flow testing.
- We were unable to evaluate the utility of risk-modelling as a decision tool because the event had already been given permission to go ahead, however it was successfully conducted in real-time, and its projections reflected the number of COVID-19 cases measured by Test and Trace.

# Introduction

As part of the public health response to limit the spread of COVID-19, live events were suspended in the United Kingdom (UK) for several months since the first national lockdown in March. The lockdown negatively impacted the country's economy and the mental health of individuals, calling for the deployment of innovative strategies to help reopen live events safely while enabling venues to operate at near or full capacity [1, 2].

Under the auspices of the UK government's Events Research Programme (ERP), a small number of legally permitted live events took place during lockdown between April and July 2021, with the aim of investigating the risk of COVID-19 transmission to inform the reopening of live mass events. Attendees were required to show proof of a negative lateral flow test (LFT), double vaccination, or natural immunity when entering the venue [3]. Findings showed that COVID-19 transmission was in line with or below community level at most events [4]. However, risk of transmission was highest at outdoor unseated events and may have been influenced by individual behaviour before and during the event, vaccination coverage, event size and duration, as well as the prevalence of COVID-19 at the time of the event, suggesting that findings from the ERP may not be generalisable to all live events.

To account for contextual differences between events, and to further increase the effectiveness and usefulness of pre-event testing for safe reopening of live events at full capacity, the CAPACITY protocol combined mass pre-event LFT testing and a data-driven risk assessment model based on levels of immunity (vaccination status) in the event population [1, 5]. The premise was that at-home, professionally verified LFT testing, combined with ticket validation and real-time risk modelling of transmission at the event would catch asymptomatic infected ticket holders before travelling to the event, and support public health authorities to make informed, data-driven decisions around the overall safety of the event. During ticket purchase, customers completed a risk questionnaire and purchased a LFT to be taken within 48 hours of entering the venue. The test was videoed and validated by a professionally trained testing control officer based on the assessment of the sample collection method. The test result was linked to a QR code that would generate a go/no-go signal to attend the event. The risk prediction model would estimate the number of infectious people at the event, their infectivity, and the risk of transmission at the event, based on parameters such as community background prevalence, characteristics of the venue and of the audience attending the event, including their vaccination status. By providing event-specific risk estimates, this protocol had the potential to inform ticketholders, event organisers, public health authorities and health systems to guide decision making as to whether the live event should go ahead as planned [6].

1  
2  
3  
4 The CAPACITY protocol was trialled in July 2021 at Standon Calling Festival (SCF), an  
5 independent boutique music festival that takes place annually in Hertfordshire. Although  
6 SCF was cancelled in Summer 2020, the festival resumed in Summer 2021 at full capacity  
7 (~15,000 people), in part because the proposed CAPACITY safety protocol helped to  
8 assuage concerns around event safety at the time, and was therefore the first event to be  
9 held outside of the ERP [7, 8].  
10  
11  
12

13  
14 The aim of our study was to investigate the views and perceptions of attendees at SCF  
15 on the feasibility and acceptability of the CAPACITY protocol using a mixed-methods  
16 design.  
17  
18  
19  
20

## 21 **Methods**

### 22 **Study design**

23  
24 We adopted a sequential explanatory mixed methods design, whereby quantitative data  
25 collection and analysis were followed by the collection and analysis of contextual,  
26 qualitative data [9]. In the first phase of the study, we collected quantitative data through  
27 an online questionnaire. The analysis of quantitative data informed the second phase of  
28 the study, during which we collected and analysed data from in-depth semi-structured  
29 interviews and a focus group discussion to further explore and expand the quantitative  
30 findings from the first phase of the study.  
31  
32  
33  
34  
35

### 36 **Quantitative methodology**

#### 37 **Participants**

38  
39 Adults who attended SCF in July 2021 and gave permission to be contacted by the  
40 research team during ticket purchase were eligible to participate in the survey and were  
41 contacted via email (n=4,726). The survey was voluntary, and participants were free to  
42 decide whether they wanted to take part.  
43  
44  
45

#### 46 **Data collection**

47  
48 Participants were surveyed anonymously in the first two weeks of November 2021  
49 through an online questionnaire to capture their views and experiences regarding the  
50 safety protocol put in place at SCF to minimise the spread and exposure to COVID-19.  
51 The survey was developed in collaboration with CERTIFIC and Standon Calling event  
52 organisers, including input from the Patient and Public Involvement group of the NW  
53 London Applied Research Collaborative, ensuring that questions were clear and in plain  
54 English. The survey was validated following two rounds of beta testing by members of the  
55  
56  
57  
58  
59  
60

1  
2  
3 study team who also tested the usability and technical functionality prior to distribution.  
4 The survey was distributed on 3 November 2021 via web-link on the Qualtrics platform,  
5 with one reminder sent the following week. The full survey is included in **Supplementary**  
6 **File 1**.  
7  
8  
9

10 The online survey comprised of 17 total items organised in five different blocks. The first  
11 captured the sociodemographic characteristics of participants, including age, gender, and  
12 ethnicity, as well as their COVID-19 vaccine status and frequency of COVID-19 testing at  
13 home before the event. The second block of questions captured participant feedback on  
14 pre-event videoed COVID-19 testing, focusing on the convenience of the procedure, data  
15 security, intrusiveness, cost, and its impact on their confidence to self-test correctly. The  
16 third block investigated the experience and sense of safety of participants at the event,  
17 and the extent to which they adopted other protective measures against COVID-19. The  
18 last two set of questions sought to determine if respondents tested positive to COVID-19  
19 within two weeks after attending the event, explored general views on pre-event safety  
20 measures, and whether respondents would recommend videoed testing for future events.  
21 The survey included multiple choice, Likert 5-point scale, and yes/no questions.  
22 Participants were asked to give consent at the start of the survey and were free to change  
23 their response up until the point of submitting the survey. All data was stored on a  
24 password encrypted database which only the study team had access to.  
25  
26  
27  
28  
29  
30

### 31 **Data analysis**

32 Sociodemographic characteristics of respondents and responses to survey questions  
33 were analysed using routine descriptive statistical methods with STATA/SE 17.0.  
34  
35  
36  
37

## 38 **Qualitative methodology**

### 39 **Participants**

40 Interviewees were randomly selected among survey respondents who voluntarily  
41 provided their contact details to be approached for a follow-up interview. Potential  
42 interviewees were contacted via email. All participants who agreed to be interviewed  
43 were asked to complete a consent form before the interview, and all gave verbal consent  
44 at the start of the interview.  
45  
46  
47  
48

### 49 **Data collection**

50 Semi-structured personal interviews and a focus group discussion were conducted  
51 through Microsoft Teams between December 2021 and January 2022 by two  
52 researchers. The research team developed an interview guide with open-ended questions  
53 that was informed by findings from the online questionnaire, seeking to further explore  
54 the experience of participants at SCF, to capture the enablers and barriers to participate  
55  
56  
57  
58  
59  
60

1  
2  
3 in COVID-secure live events, and to investigate attitudes and perceptions on pre-event  
4 safety measures and medically certified home-based testing. The semi-structured  
5 interview guide is included in **Supplementary File 2**. Thematic saturation was achieved  
6 after seven in depth personal interviews and one focus group discussion with 4  
7 participants (n=11 total participants), each lasting between thirty and sixty minutes.  
8 Interviews were recorded, auto-transcribed, manually checked, and pseudonymised.  
9

### 12 **Data analysis**

13 Interview transcripts were analysed inductively through thematic analysis by manually  
14 identifying codes and subsequently through the formation of themes. Two researchers  
15 reviewed the transcripts and agreed on the emergent themes, that were further discussed  
16 with the research team. Once emergent themes were categorised and considered in  
17 context, quotes from transcripts reflecting key themes were captured.  
18  
19

### 21 **Ethics**

22 The study received ethical approval from the Imperial College London Ethics Committee  
23 (ICREC 21IC6705). The survey was anonymous, and respondents were not asked to  
24 provide personal details unless they voluntarily expressed to be contacted for a follow-up  
25 interview. Participants were asked to give written and oral consent before the start of  
26 interviews. Participants were free to withdraw from the survey or interview at any time. A  
27 lottery to receive free tickets to the next SCF was provided by the event organisers as an  
28 inducement for ticket holders to participate in the evaluation. Interview data was  
29 pseudonymised.  
30  
31  
32  
33

### 35 **Patient and Public Involvement**

36 No patient was involved in this study.  
37  
38  
39  
40  
41

## 42 **Results**

43 A total of 1,093 respondents completed the survey, and contextual data was collected by  
44 interviewing 11 participants. Results from the survey and interviews are reported in the  
45 following sections.  
46  
47  
48

### 50 **Survey**

51 Results from the survey were reported using the CHERRIES Checklist [10]. A total of  
52 1,093 participants completed the survey out of the 4,726 that were contacted (response  
53  
54  
55  
56  
57  
58  
59

rate 23.1%). Characteristics of survey respondents are summarised in **Table 1**, and survey results are reported in **Supplemental Table S1**.

**Table 1: sample size and characteristics of respondents of the survey.**

|                                                          | <b>N</b> | <b>%</b> |
|----------------------------------------------------------|----------|----------|
| <b>Total</b>                                             | 1093     | 100.0    |
| <b>Gender</b>                                            |          |          |
| Female                                                   | 711      | 65.5     |
| Male                                                     | 374      | 34.5     |
| <b>Age</b>                                               |          |          |
| 15-24                                                    | 122      | 11.3     |
| 25-39                                                    | 290      | 26.7     |
| 40-54                                                    | 483      | 44.6     |
| ≥55                                                      | 186      | 17.4     |
| <b>Ethnicity</b>                                         |          |          |
| White                                                    | 1030     | 95.5     |
| Mixed/multiple ethnic groups                             | 28       | 2.6      |
| Asian/Asian British                                      | 8        | 0.7      |
| Black/African/Caribbean/Black British                    | 2        | 0.2      |
| Other                                                    | 11       | 1.0      |
| <b>COVID-19 vaccine status before the event</b>          |          |          |
| Fully vaccinated (2 doses)                               | 832      | 76.2     |
| Partially vaccinated (1 dose)                            | 220      | 20.2     |
| Not vaccinated                                           | 41       | 3.6      |
| <b>Routine COVID-19 testing at home before the event</b> |          |          |
| At least once a week                                     | 504      | 46.2     |
| Not regularly                                            | 457      | 41.8     |
| Never                                                    | 131      | 12.0     |

Overall, most respondents agreed or strongly agreed that videoed pre-event testing was convenient (81.0 %, **Figure 1**) and not intrusive (82.8%), and about three-quarters of respondents agreed or strongly agreed that the cost of the test was reasonable (73.6%). A significant proportion of respondents agreed or strongly agreed that they were not concerned with the security of their data (72.6%), and about three-quarters of respondents agreed or strongly agreed that they felt confident in their results knowing that the pre-event testing was videoed (76.2%).

Nearly half the respondents (45.0%) felt that having completed a videoed LFT increased their confidence to self-test correctly. Less than 1% of respondents (0.4%) felt they were still not confident to self-test correctly.



1  
2  
3 Most respondents agreed or strongly agreed that knowing that everyone at the event had  
4 been tested made them feel safer (85.5%, **Figure 1**). The large majority disagreed or  
5 strongly disagreed that pre-event testing interfered with how much fun they had at the  
6 event (93.7%).  
7  
8

9  
10 About half of respondents reported having regularly washed their hands during the event  
11 (51.2%), making it the most common form of prevention against COVID-19. One-third of  
12 respondents reported having socially distanced to some extent (33.4%), although only a  
13 small proportion reported having maintained social distancing at most times during the  
14 event (8.1%). More than half of respondents reported not having worn a face mask or  
15 covering at all throughout the event (54.7%).  
16  
17

18  
19 Almost all respondents reported not having tested positive for COVID-19 within two weeks  
20 of attendance to SCF (1,053 respondents, 95.5%). Only 38 respondents (3.5%) tested  
21 positive for COVID-19 within two weeks of attendance to the event.  
22  
23

24 Most respondents agreed or strongly agreed that pre-event testing reduces the risk of  
25 catching COVID-19 (87.1%, **Figure 1**), however nearly all respondents (97.5%) agreed  
26 or strongly agreed that it cannot reduce the risk to zero. A significant proportion of  
27 respondents agreed or strongly agreed that other events should adopt videoed testing at  
28 home (76.4%). About a third of respondents agreed that they would have valued to  
29 receive a personal risk score of catching COVID-19 at the event (35.6%), while another  
30 third was neutral about this (34.8%). The majority of respondents (89.4%) agreed or  
31 strongly agreed that home-based testing was preferred to at-the-door testing.  
32  
33  
34  
35

36 Most respondents (93.7%) reported that the requirement of at-home videoed rapid testing  
37 would not influence their decision to attend future events.  
38  
39  
40

## 41 Interviews

42 By interviewing a subset of survey respondents, we were able to further explore the  
43 findings from the online questionnaire. The characteristics of interviewees are  
44 summarised in **Table 2**.  
45  
46  
47

48 Although the risk modelling was successfully conducted in real-time and its projections  
49 were largely in line with the number of COVID-19 cases that emerged from SCF as  
50 measured by Test and Trace, it was not used at the event because permission for it to go  
51 ahead had already been granted. Therefore, we were unable to interview public health  
52 authorities to assess the utility of the risk modelling as a go/no-go decision tool.  
53  
54  
55  
56  
57  
58  
59  
60



Three main themes emerged from the data: overall impressions of respondents on the safety protocol, particularly on its feasibility, acceptability, and the learning associated with it; experience of respondents at the event, including the impact of the safety protocol on their sense of safety, and the use of other protective measures against COVID-19; general views on the value and relevance of pre-event safety procedures and on medically certified home-based testing.

**Table 2: Sample size and characteristics of interviewees**

**Table 3: Sample size and characteristics of interviewees**

|                              | N (%) | %     |
|------------------------------|-------|-------|
| <b>Total</b>                 | 11    | 100.0 |
| <b>Gender</b>                |       |       |
| Female                       | 6     | 54.5  |
| Male                         | 5     | 45.4  |
| <b>Age</b>                   |       |       |
| 15-24                        | 2     | 18.2  |
| 25-39                        | 1     | 9.1   |
| 40-54                        | 1     | 9.1   |
| ≥55                          | 7     | 63.6  |
| <b>Ethnicity</b>             |       |       |
| White                        | 9     | 81.8  |
| Mixed/multiple ethnic groups | 1     | 9.1   |
| <b>Other</b>                 | 1     | 9.1   |

### Overall impressions on the safety protocol

All respondents were positively impressed with the safety protocol. They agreed that it was feasible, efficient and straightforward, and they could not identify major drawbacks.

*“I was really impressed. It was cheap. It was easy. ... It worked really well, I was very pleased with it from start to finish. And at the time I thought it was a great idea. ... I can't think of a drawback from the testing process.” (P7, age 55)*

For many respondents, this was the first event they were able to attend since the beginning of the COVID-19 pandemic, and therefore found this procedure acceptable for the festival to take place. None of the participants reported concerns regarding the intrusiveness of the test or the way personal data was handled. Respondents agreed that the cost of the test was marginal with respect to the overall price of the ticket, and therefore accessible, even for families or large group bookings. Some participants in the older age groups feared to experience technological difficulties while carrying out the

1  
2  
3 videoed test. Nevertheless, they were willing to do it and were able to successfully  
4 complete the procedure.  
5  
6

7 Although the safety protocol implied that videoed self-tests were reviewed by a  
8 professional, one respondent had doubts that all videos were being checked, given the  
9 large amount of festival attendees and the short time window between the test submission  
10 and the start of the festival. However, another respondent believed that there was  
11 someone manually checking the videos given that test results were not made available  
12 immediately.  
13  
14  
15

16 *“The fact that you had to give it in, but the time scales were such that you wouldn't*  
17 *necessarily get replies at certain points made me believe that there was a real*  
18 *person watching them all. ... And that gave me a reassurance.” (P2, age 53)*  
19  
20  
21

22 We asked participants about the impact of videoed testing on their confidence in self-  
23 testing. The majority did not notice any change in confidence in their self-testing technique  
24 after carrying out a videoed test, since they were used to testing regularly before attending  
25 the event. However, one respondent said that the videoed aspect of it might have had a  
26 positive impact on her self-testing technique:  
27  
28  
29

30 *“The animation person was doing it and then you kind of follow, so you know you're*  
31 *doing the right thing and it probably did influence my tests afterwards because I'd*  
32 *seen that and it was in my memory.” (P3, age 28)*  
33  
34  
35

### 36 **Experience at the event**

37 Respondents believed that the protocol helped to minimise the spread of COVID-19. This  
38 contributed to create a feeling of safety and reassurance among participants at the event.  
39  
40  
41

42 *“I was very aware of the fact that nothing was going to stop a certain amount of*  
43 *infections taking place, but it minimized, and that to me was the main point. ... I*  
44 *felt much safer there, I felt much happier.” (P1, age 57)*  
45  
46

47 Several respondents stressed that they felt safer at the event knowing that everybody  
48 had been tested and that the protocol implied people had to strictly follow a set of  
49 instructions to be able to attend the event.  
50  
51

52 *“The general belief and understanding that this was a COVID free zone was partly*  
53 *reinforced by the fact that I believe that everyone had been properly screened and*  
54  
55  
56  
57  
58  
59

1  
2  
3 *proven to be COVID free within the days before entering the venue, and the*  
4 *videoed testing supported that.” (P7, age 55)*  
5  
6

7 Some respondents attributed the added sense of safety to the robustness to videoed  
8 testing, which to many seemed harder to forge compared to other testing protocols, for  
9 example those that require to upload a picture of the test result.  
10

11  
12 When asked about other preventive measures against COVID-19 adopted at the event,  
13 most respondents agreed that it did not feel necessary to wear a mask or to socially  
14 distance given that everyone had been tested, and that the event was outdoors. However,  
15 they all reported using hand sanitiser throughout the festival.  
16  
17  
18

### 19 20 **General views on pre-event safety procedures and medically certified home-based** 21 **testing** 22

23 We asked respondents whether they would recommend this safety protocol for future  
24 events. While the majority agreed that videoed testing was very relevant at the time of  
25 SCF, they thought it may not be as necessary moving forward, given the difference of the  
26 current circumstances compared to last Summer, including the availability of vaccines  
27 and the increased frequency in self-testing among the general population.  
28  
29  
30

31 *“I thought it's perfect for last Summer, but ... I think we're way past now this kind*  
32 *of filming people to do an LFT ... Last summer we didn't really understand the*  
33 *disease to the same way that we do now, and loads of people weren't vaccinated.*  
34 *Now, everyone has had the opportunity to be vaccinated. ... I don't feel like we*  
35 *should be protecting people to the same extent because people should be*  
36 *protecting themselves.” (P9, age 46)*  
37  
38  
39

40 Participants were also asked whether they would find it useful to receive a personalised  
41 COVID-19 risk score before attending an event, calculated based on their vaccine status,  
42 that of other attendees, and the characteristics of the venue. While some would find it  
43 useful, the majority thought that a high-risk score would not stop them from going to an  
44 event. This may be because people would have taken other precautions or made their  
45 own considerations about the consequences and losses involved.  
46  
47  
48

49 We asked respondents about their views on the potential of medically certified home-  
50 based testing for other diseases, such as flu, diabetes or HIV. The majority of respondents  
51 agreed that home-based testing could be useful, as long as tests are easy to carry out  
52 and people have the right skills and confidence to do them.  
53  
54  
55  
56  
57  
58  
59

1  
2  
3  
4  
5  
6  
7  
8  
9  
10  
11  
12  
13  
14  
15  
16  
17  
18  
19  
20  
21  
22  
23  
24  
25  
26  
27  
28  
29  
30  
31  
32  
33  
34  
35  
36  
37  
38  
39  
40  
41  
42  
43  
44  
45  
46  
47  
48  
49  
50  
51  
52  
53  
54  
55  
56  
57  
58  
59  
60

*“I think home testing is a wonderful step forward. ... Most people would really appreciate being able to do those things at home ... as long as it's an easy process and you have confidence in the process and confidence in your ability to do it so that the result is accurate.” (P1, age 57)*

Other participants stressed that having the opportunity to test for everything may become excessive and lead to negative consequences, resulting in people not taking sufficient responsibility, ignoring social norms, and even in the worsening of health outcomes.

*“I think also there's the danger of promoting a false sense of security through test for too many things, so people then take no notice of the normal nor the social norms. Another thing that reduced the rate of flu last winter was the fact that we were socially isolating, washing our hands and doing all the other things, so you know perhaps it's almost a reason for not testing for flu, you know, make sure that people take responsibility.” (P10, age 71)*

## Discussion

The aim of our study was to explore the views and perceptions of individuals who attended SCF in July 2021 in relation to the safety protocol that was implemented to minimise transmission of COVID-19 at the event. Our findings show that the protocol was highly acceptable, accessible, feasible, and reliable. Participants agreed that videoed testing was straightforward, not intrusive, and inexpensive, and it did not negatively impact their experience at the event. Videoed testing was helpful to improve the ability to self-test, and increased confidence in test results. Additionally, by interviewing a subgroup of survey respondents we found that participants felt safe at the event knowing that everyone had followed a robust testing protocol that contributed to minimise the spread of COVID-19 and did not feel it was necessary to follow additional safety measures at the event such as social distancing or mask wearing. The protocol of at-home, professionally validated self-testing linked to ticketing, won the Full Production Award at the UK Events Management Awards in December 2022, with judges saying:

“Delivering live festivals on the back of a pandemic and in the midst of a pingdemic was a truly challenging set of circumstances. Achieving success was a considerable feat and is one which set parameters within which other festivals could operate. Standon Calling 2021 was a risk but definitely one worth taking!”

(<https://eventproductionawards.com/eventproductionawards2022/en/page/2022-winners>)

In this evaluation, some respondents mentioned that although videoed testing was very relevant at the time of SCF, it may not be as necessary for future events given significant

1  
2  
3 improvements in the COVID-19 pandemic in the UK since last Summer. Participants also  
4 reported that having access to personalised risk scores would not extensively influence  
5 their decision to attend an event. Most respondents agreed that medically certified home-  
6 based testing has the potential to be used for other diseases if tests are easy to carry out  
7 and patients feel confident enough to do and interpret them. However, the ability to test  
8 excessively might negatively impact individual responsibility and people's respect of  
9 social norms.  
10  
11  
12

13  
14 Home-based self-testing is widely used in healthcare. Studies have shown that self-  
15 testing for chronic disease management, such as diabetes, or diagnostics, such as HIV,  
16 is highly accepted among patients. Most patients can easily perform these tests, obtain  
17 accurate results, and correctly interpret them [11-14]. There are several advantages  
18 associated with home-based self-testing, including reduced costs of care, increased  
19 availability and uptake, and patient empowerment [13, 15]. Concerns with self-testing are  
20 often associated with user errors in performance or interpretation of results, leading  
21 patients to report the wrong outcome and change their behaviour accordingly [12, 14, 16].  
22 This can be avoided by ensuring that self-tests are simple and easy to use, and that  
23 patients are provided with better instructions to carry out and interpret tests correctly [17].  
24 Our findings show that professionally witnessed home-based videoed testing is feasible  
25 and reliable and has potential to be implemented in other health spheres to increase  
26 confidence among patients in disease self-management and further support correct  
27 interpretation of results.  
28  
29  
30  
31  
32

33  
34 Although the majority of respondents believed that the CAPACITY protocol was very  
35 relevant at the time of SCF, it may not be as useful for the current UK context given that,  
36 at the time of writing, all restrictions in relation to COVID-19 are close to being lifted [18].  
37 However, this safety protocol may be relevant in countries where the live event industry  
38 has been heavily affected by the recent rise in COVID-19 infections associated with the  
39 Omicron variant. For example, several live events have been cancelled in Australia [19],  
40 while in New Zealand they are currently capped at 100 people, who have to prove they  
41 have been vaccinated in order to gain entry to the event [20]. In these contexts, the  
42 CAPACITY protocol may be a useful strategy to support the safe reopening of live mass  
43 events at full capacity, while minimising transmission of COVID-19.  
44  
45  
46  
47

### 48 **Limitations**

49 Our study was the first to evaluate the feasibility and acceptability of a safety protocol that  
50 involves professionally witnessed home-based videoed pre-event testing to minimise  
51 COVID-19 transmission and support the safe reopening of live mass events at full  
52 capacity. Our findings, however, have some limitations.  
53  
54  
55  
56  
57  
58  
59

1  
2  
3 The survey and interviews were conducted several months after the event took place,  
4 therefore the study may be subject to both recall and/or selection bias. Although our study  
5 sample was largely representative of the event population, interviewees were a small,  
6 self-selected subset of survey respondents. It is plausible that individuals who agreed to  
7 be interviewed may have had greater awareness of and interest in the research topic  
8 compared with those who did not participate, which may be an indication of selection bias.  
9 Although it is not possible to predict how selection bias might have influenced the findings  
10 of the research, if survey respondents were more likely to be those that were interested  
11 in technology and novel innovations, or capable of responding to the electronic survey,  
12 then it may have led to a spuriously positive assessment of the protocol.  
13  
14  
15  
16  
17

18 Further, the way in which participants responded to the safety protocol may have been  
19 influenced by the audience composition, given that SCF is a family-friendly, boutique  
20 festival. The study is of only one event, in a specific context, that is characterised by  
21 attracting families, often with young children. The attendees that responded to the survey  
22 were predominantly aged 40-54 (45%), of white ethnicity (95%) and female (65%) and  
23 this reflected the characteristics of the attendees at the event as a whole. Although the  
24 numbers were too small for direct comparison, the interviewees were also largely of the  
25 same age, gender and ethnicity. However, we acknowledge the possibility that attendees  
26 at other types of events might have a different experience of the protocol. For example, it  
27 is possible that attendees at an opera, a cinema, or a heavy metal rock concert, would  
28 have different views of at-home, professionally videoed lateral flow testing. It was not  
29 possible to compare the experience of the protocol in other settings and we were not able  
30 to assess the generalisability of the survey and interview findings, as this was the only  
31 live event to use the CAPACITY protocol, and the first live event to be held outside of the  
32 Events Research Programme. However, there were no themes or responses that  
33 suggested that the protocol was either so inconvenient, unpalatable or ineffective, that  
34 other events, of a ticketed nature, could not consider using it. Clearly, the public health  
35 imperative, which in this case was the COVID pandemic, needs to exist to justify the use  
36 of the protocol.  
37  
38  
39  
40  
41  
42  
43

44 Lastly, although the risk modelling successfully predicted the number of COVID-19 cases  
45 arising from the event in real-time as measured by Test and Trace, we were unable to  
46 evaluate the utility of risk-modelling as a go/no-go decision tool because it was a fast-  
47 moving environment and the event had already been given permission to go ahead.  
48 However, operationally the modelling was possible and has potential to support decision  
49 making at future events.  
50  
51  
52

## 53 **Conclusion**

54  
55  
56  
57  
58  
59  
60



1  
2  
3 Our study has shown that a safety protocol involving professionally witnessed home-  
4 based videoed pre-event testing for COVID-19 can support the safe reopening of live  
5 mass events at full capacity and is highly acceptable and feasible. While it may not  
6 necessarily be relevant for the current UK context, it can be useful for other countries  
7 where live events are currently suspended or are taking place at reduced capacity due to  
8 high numbers of COVID-19 infections. Risk modelling has the potential to further increase  
9 the robustness of this protocol and should be tested and evaluated at future events.  
10  
11  
12  
13

---

## 14 15 **Ethics**

16 The study received ethical approval from the Imperial College London Ethics Committee  
17 (ICREC 21IC6705). The survey was anonymous, and respondents were not asked to  
18 provide personal details unless they voluntarily expressed to be contacted for a follow-up  
19 interview. Participants were asked to give written and oral consent before the start of  
20 interviews. Participants were free to withdraw from the survey or interview at any time  
21 however a lottery to receive free tickets to the 2022 SCF was provided by the event  
22 organisers as an inducement for ticket holders to participate in the evaluation. Interview  
23 data was pseudonymised. The interviews were transcribed with the principle of anonymity  
24 in mind and transcriptions were not outsourced, therefore no confidentiality agreements  
25 were required. All data generated or analysed during this study are included in this  
26 published article.  
27  
28  
29  
30  
31

## 32 33 **Consent**

34 Consent to enter the study was sought from each participant only after a full explanation  
35 of the study was given, documentation was offered, and time allowed for consideration.  
36 The right of the participant to refuse to participate without giving reasons was respected.  
37 All participants were free to withdraw at any time and without giving reasons. Participants  
38 were notified on the plans for publication and were reminded that all their data was  
39 pseudonymised.  
40  
41  
42

## 43 44 **Funding**

45 This research received no specific grant from any funding agency in the public,  
46 commercial or not-for-profit sectors. MH, GD, AA and AEO are in part supported by the  
47 National Institute for Health Research (NIHR) Applied Research Collaboration (ARC)  
48 Northwest London. The views expressed are those of the authors and not necessarily  
49 those of the NHS or the NIHR or the Department of Health and Social Care.  
50  
51

52 **Author Contributions:** All authors provided substantial contributions to the conception  
53 design, acquisition and interpretation of study data and approved the final version of the  
54 paper. MH, AEO and JK took the lead in planning the study with support from co-authors.  
55  
56  
57  
58  
59  
60

1  
2  
3 GD and AA carried out interviews and data analysis, with support from MH, AEO and JK.  
4 MH is the guarantor.  
5  
6

7 **Data sharing statement:** No further data are available.  
8  
9

10 **Competing interests:** JK is currently Director of Health Optimisation at the Center for  
11 Health and Human Performance (London, UK), and co-founder and Medical Director of  
12 CERTIFIC.  
13  
14

### 15 **Acknowledgments**

16 MH, AA, GD and AEO are supported in part by the Northwest London NIHR Applied  
17 Research Collaboration. Imperial College London is grateful for support from the NW  
18 London NIHR Applied Research Collaboration and the Imperial NIHR Biomedical  
19 Research Centre.  
20  
21

### 22 **Disclaimer**

23 The views expressed in this publication are those of the authors and not necessarily those  
24 of the NIHR or the Department of Health and Social Care.  
25  
26

---

## 27 28 29 30 31 **References**

- 32 1. Harris M, Kreindler J, El-Osta A, Esko T, Majeed A: Safe management of full-capacity  
33 live/mass events in COVID-19 will require mathematical, epidemiological and  
34 economic modelling. *J R Soc Med.* 2021; 114(6):290-294.  
35
- 36 2. Drury J, Rogers MB, Marteau TM, Yardley L, Reicher S, Stott C: Re-opening live  
37 events and large venues after Covid-19 'lockdown': Behavioural risks and their  
38 mitigations. *Safety Science.* 2021; 139:105243.  
39
- 40 3. GOV.UK. Information on the Events Research Programme. Available from:  
41 [https://www.gov.uk/government/publications/information-on-the-events-research-](https://www.gov.uk/government/publications/information-on-the-events-research-programme/information-on-the-events-research-programme)  
42 [programme/information-on-the-events-research-](https://www.gov.uk/government/publications/information-on-the-events-research-programme/information-on-the-events-research-programme)  
43 [programme](https://www.gov.uk/government/publications/information-on-the-events-research-programme/information-on-the-events-research-programme) [Accessed 15<sup>th</sup> February  
44 2022].  
45
- 46 4. GOV.UK. Events Research Programme (ERP) - Capping summary. Available from:  
47 [https://www.gov.uk/government/publications/events-research-programme-phase-ii-](https://www.gov.uk/government/publications/events-research-programme-phase-ii-and-iii-findings/event-research-programme-erp-capping-summary)  
48 [and-iii-findings/event-research-programme-erp-](https://www.gov.uk/government/publications/events-research-programme-phase-ii-and-iii-findings/event-research-programme-erp-capping-summary)  
49 [capping-summary](https://www.gov.uk/government/publications/events-research-programme-phase-ii-and-iii-findings/event-research-programme-erp-capping-summary) [Accessed 15<sup>th</sup>  
50 February 2022].  
51
- 52 5. Donnat C, Bunbury F, Kreindler J, Liu D, Filippidis FT, Esko T, El-Osta A, Harris M:  
53 Predicting COVID-19 Transmission to Inform the Management of Mass Events:  
54 Model-Based Approach. *JMIR Public Health Surveill.* 2021; 7(12):e30648.  
55  
56  
57  
58  
59  
60



- 1
  - 2
  - 3
  - 4
  - 5
  - 6
  - 7
  - 8
  - 9
  - 10
  - 11
  - 12
  - 13
  - 14
  - 15
  - 16
  - 17
  - 18
  - 19
  - 20
  - 21
  - 22
  - 23
  - 24
  - 25
  - 26
  - 27
  - 28
  - 29
  - 30
  - 31
  - 32
  - 33
  - 34
  - 35
  - 36
  - 37
  - 38
  - 39
  - 40
  - 41
  - 42
  - 43
  - 44
  - 45
  - 46
  - 47
  - 48
  - 49
  - 50
  - 51
  - 52
  - 53
  - 54
  - 55
  - 56
  - 57
  - 58
  - 59
  - 60
6. Sleat D, Innes K, Parker I: Are vaccine passports and covid passes a valid alternative to lockdown? *BMJ*. 2021; 375:n2571.
7. BBC News. Standon Calling: Hertfordshire festival confirmed to take place in July. BBC News. Jun 29 2021. Available from: <https://www.bbc.co.uk/news/uk-england-beds-bucks-herts-57654584> [Accessed 15<sup>th</sup> February 2022].
8. Standon Calling. June 2021 statement. Available from: <https://standon-calling.com/2021/06/june-2021-statement/> [Accessed 15<sup>th</sup> February 2022].
9. Tariq S, Woodman J: Using mixed methods in health research. *JRSM Short Rep*. 2013; 4(6):2042533313479197.
10. Eysenbach G: Improving the quality of Web surveys: the Checklist for Reporting Results of Internet E-Surveys (CHERRIES). *J Med Internet Res*. 2004; 6(3):e34-e34.
11. Ibitoye M, Frasca T, Giguere R, Carballo-Diequez A: Home testing past, present and future: lessons learned and implications for HIV home tests. *AIDS Behav*. 2014; 18(5):933-949.
12. Figueroa C, Johnson C, Ford N, Sands A, Dalal S, Meurant R, Prat I, Hatzold K, Urassa W, Baggaley R: Reliability of HIV rapid diagnostic tests for self-testing compared with testing by health-care workers: a systematic review and meta-analysis. *Lancet HIV*. 2018; 5(6):e277-e290.
13. Tidy EJ, Shine B, Oke J, Hayward G: Home self-testing kits: helpful or harmful? *Br J Gen Pract*. 2018; 68(673):360-361.
14. Atchison C, Pristerà P, Cooper E, Papageorgiou V, Redd R, Piggitt M, Flower B, Fontana G, Satkunarajah S, Ashrafian H et al: Usability and Acceptability of Home-based Self-testing for Severe Acute Respiratory Syndrome Coronavirus 2 (SARS-CoV-2) Antibodies for Population Surveillance. *Clin Infect Dis*. 2021; 72(9):e384-e393.
15. O’Kane MJ: Patient self-testing in chronic disease management. *Journal of Laboratory Medicine*. 2020; 44(2):81-87.
16. Erbach M, Freckmann G, Hinzmann R, Kulzer B, Ziegler R, Heinemann L, Schnell O: Interferences and Limitations in Blood Glucose Self-Testing: An Overview of the Current Knowledge. *J Diabetes Sci Technol*. 2016; 10(5):1161-1168.
17. Tonen-Wolyec S, Batina-Agasa S, Muwonga J, Mboumba Bouassa R-S, Kayembe Tshilumba C, Bélec L: Acceptability, feasibility, and individual preferences of blood-based HIV self-testing in a population-based sample of adolescents in Kisangani, Democratic Republic of the Congo. *PLoS One*. 2019; 14(7):e0218795-e0218795.
18. Gillett F, Lee J. Covid: Self-isolation law could be scrapped in England this month. BBC News. Feb 10 2022. Available from: <https://www.bbc.co.uk/news/uk-60319947> [Accessed 15<sup>th</sup> February 2022].
19. Proust K, Doak E. COVID-19 puts future of live music in doubt as more events are cancelled, but hope is left for some. ABC News. Jan 12 2022. Available from: <https://www.abc.net.au/news/2022-01-12/music-festivals-cancelled-as-nsw-grapples-with-covid/100748410> [Accessed 15<sup>th</sup> February 2022].

1  
2  
3 20. Covid19.govt.nz. Events at Red. Available from: [https://covid19.govt.nz/traffic-](https://covid19.govt.nz/traffic-lights/life-at-red/events-and-public-facilities-at-red/events-at-red/)  
4 lights/life-at-red/events-and-public-facilities-at-red/events-at-red/ [Accessed 15<sup>th</sup>  
5 February 2022].  
6  
7  
8  
9  
10

## 11 Figure legends

12  
13  
14 **Figure 1:** percentage of respondents who agreed or disagreed with various statements  
15 about videoed pre-event COVID-19 testing, safety and experience (n=1,093).  
16  
17  
18  
19  
20  
21  
22  
23  
24  
25  
26  
27  
28  
29  
30  
31  
32  
33  
34  
35  
36  
37  
38  
39  
40  
41  
42  
43  
44  
45  
46  
47  
48  
49  
50  
51  
52  
53  
54  
55  
56  
57  
58  
59  
60

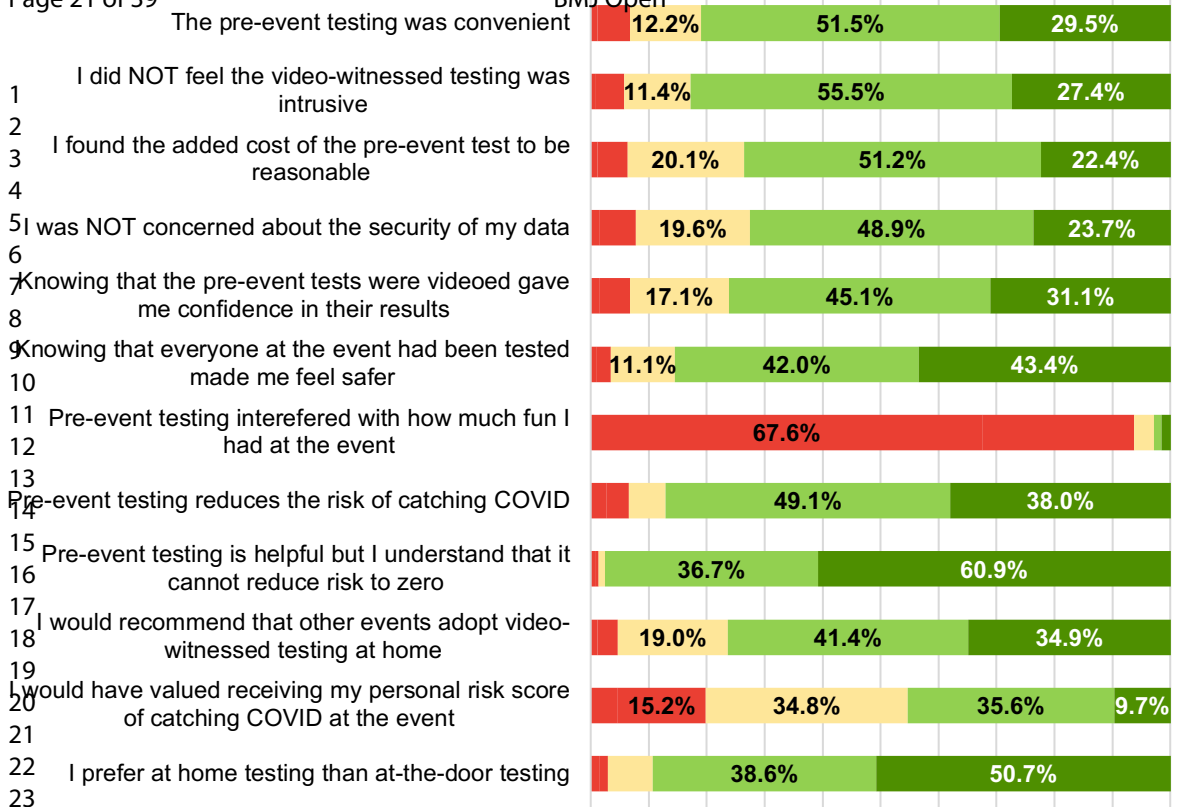

For peer review only - <http://bmjopen.bmj.com/>

Strongly disagree Disagree Neutral Agree Strongly agree

# STANDON-CALLING's IMPERIAL COLLEGE POST-EVENT RESEARCH eSurvey Export

---

## Q1

Researchers at the Department of Primary Care & Public Health, Imperial College London are inviting you to participate in a study related to the Standon Calling live event (22-25 July 2021) which you attended.

At the event, you provided consent to be contacted by the research team so that they might learn about your experience of purchasing a ticket and the event itself. Standon Calling involved pre-event home based COVID-19 tests and questionnaires. Through this short (10 minutes) electronic survey we would like to learn about your perspectives of those processes and their impact on your experience at the festival.

Please take a moment to review the [Participant Information Sheet](#) to learn more about the study.

---

## Q2 Please confirm that you consent to participate in this survey

- Yes, I consent to contribute to the research (1)
  - No, thank you. I prefer not to contribute to the research (2)
- 

## Q3 Prior to purchasing your ticket to the Standon Calling live event, did you routinely do rapid lateral flow tests at home for COVID?

- Yes - I've done testing at home, at least once a week (1)
- Yes - I have done a few tests in the past, but not regularly (2)
- No - I've never routinely done rapid tests (3)

1  
2  
3  
4  
5  
6  
7  
8  
9  
10  
11  
12  
13  
14  
15  
16  
17  
18  
19  
20  
21  
22  
23  
24  
25  
26  
27  
28  
29  
30  
31  
32  
33  
34  
35  
36  
37  
38  
39  
40  
41  
42  
43  
44  
45  
46  
47  
48  
49  
50  
51  
52  
53  
54  
55  
56  
57  
58  
59  
60

---

**Q4 Having completed your videoed lateral flow test on the CERTIFIC App or Web portal, do you feel more confident that you would be able to correctly do the test on yourself or on others in the future?**

- Yes - the app has made me more confident to self-test correctly (1)
  - No Difference - this was exactly the same as what I always did (2)
  - No - I am still not confident to self-test correctly (3)
- 

For peer review only

1  
2  
3 Q5

4 **To what extent do you agree or disagree with the following statements?**  
5  
6  
7  
8  
9  
10  
11  
12  
13  
14  
15  
16  
17  
18  
19  
20  
21  
22  
23  
24  
25  
26  
27  
28  
29  
30  
31  
32  
33  
34  
35  
36  
37  
38  
39  
40  
41  
42  
43  
44  
45  
46  
47  
48  
49  
50  
51  
52  
53  
54  
55  
56  
57  
58  
59  
60

For peer review only

1  
2  
3  
4  
5  
6  
7  
8  
9  
10  
11  
12  
13  
14  
15  
16  
17  
18  
19  
20  
21  
22  
23  
24  
25  
26  
27  
28  
29  
30  
31  
32  
33  
34  
35  
36  
37  
38  
39  
40  
41  
42  
43  
44  
45  
46  
47  
48  
49  
50  
51  
52  
53  
54  
55  
56  
57  
58  
59  
60

|                                                                                        | Strongly disagree (1) | Disagree (2)          | Neutral (3)           | Agree (4)             | Strongly agree (5)    |
|----------------------------------------------------------------------------------------|-----------------------|-----------------------|-----------------------|-----------------------|-----------------------|
| Pre-event testing reduces the risk of catching COVID (9)                               | <input type="radio"/> |
| The pre-event testing with CERTIFIC was convenient (12)                                | <input type="radio"/> |
| I prefer home based testing than at-the-door testing (10)                              | <input type="radio"/> |
| Knowing that everyone at the event had been tested made me feel safer (4)              | <input type="radio"/> |
| Pre-event testing is helpful but I understand that it cannot reduce risk to zero (6)   | <input type="radio"/> |
| Knowing that the pre-event tests were videoed gave me confidence in their results (13) | <input type="radio"/> |

1  
2  
3  
4  
5  
6  
7  
8  
9  
10  
11  
12  
13  
14  
15  
16  
17  
18  
19  
20  
21  
22  
23  
24  
25  
26  
27  
28  
29  
30  
31  
32  
33  
34  
35  
36  
37  
38  
39  
40  
41  
42  
43  
44  
45  
46  
47  
48  
49  
50  
51  
52  
53  
54  
55  
56  
57  
58  
59  
60

Pre-event testing interfered with how much fun I had at the event (14)

I would recommend that other events adopt video-witnessed testing at home (15)

I found the added cost of the pre-event test to be reasonable (16)

I was NOT concerned about the security of my data (17)

I did NOT feel the video-witnessed testing was intrusive (18)

I would have valued receiving my personal risk score of catching COVID at the event (19)

|                       |                       |                       |                       |                       |
|-----------------------|-----------------------|-----------------------|-----------------------|-----------------------|
| <input type="radio"/> |
| <input type="radio"/> |
| <input type="radio"/> |
| <input type="radio"/> |
| <input type="radio"/> |

For peer review only



1  
2  
3 **Q6 Have you tested positive for COVID since attending Standon Calling?**  
4

- 5  
6  No- I did not test positive for COVID within the first 2 weeks of participating in Standon  
7 Calling (1)  
8  
9  Yes- I tested positive for COVID within 2 weeks of participating in Standon Calling (2)  
10  
11
- 

12  
13  
14 **Q7 How did you access the CERTIFIC platform?**  
15

- 16  
17  App for Apple (IOS) (1)  
18  
19  App for Android / Google (2)  
20  
21  Web-based (4)  
22  
23  Other (5)  
24  
25  
26
- 

27  
28  
29 **Q8 Please tell us your views about using the CERTIFIC App (please tick all that apply)**  
30

- 31  
32  The app was relatively easy to use (2)  
33  
34  The procedure was not very time consuming (4)  
35  
36  I felt my data was safeguarded (3)  
37  
38  I still have the app on my phone (5)  
39  
40  
41  I would recommend using the CERTIFIC app for this purpose to my friends &  
42 family (6)  
43  
44  
45  
46  
47  
48  
49  
50  
51  
52  
53  
54  
55  
56  
57  
58  
59  
60
-

1  
2  
3 **Q9 To what extent did you wear a mask, maintained social distancing and/or washed**  
4 **your hands during the Standon Calling event?**

|                                                     | Not at all (1)        | Not really (4)        | To some extent (2)    | Yes, mostly (3)       |
|-----------------------------------------------------|-----------------------|-----------------------|-----------------------|-----------------------|
| I consistently wore a face mask / face covering (2) | <input type="radio"/> | <input type="radio"/> | <input type="radio"/> | <input type="radio"/> |
| I maintained social distancing (3)                  | <input type="radio"/> | <input type="radio"/> | <input type="radio"/> | <input type="radio"/> |
| I maintained regular hand washing (4)               | <input type="radio"/> | <input type="radio"/> | <input type="radio"/> | <input type="radio"/> |

21  
22  
23  
24  
25  
26 **Q10 How many people (other than yourself) did you attend the event with?**

- 27  
28  
29  I went alone (4)
- 30  
31  +1 (1)
- 32  
33  +2 (2)
- 34  
35  +3 or more (3)

36  
37  
38  
39  
40  
41 **Q11 Please tell us about your vaccine status prior to attending the event (choose one**  
42 **that applies):**

- 43  
44  
45  I was not vaccinated against COVID (1)
- 46  
47  I had already received 1 dose (partially vaccinated) (2)
- 48  
49  I had already received 2 doses (fully vaccinated) (3)

1  
2  
3 **Q12 If at-home, videoed, rapid testing is required to be completed in a similar fashion for**  
4 **future events, would you still attend those events?**  
5

- 6  
7  Yes- it makes no difference to my decision to attend (1)  
8  
9  Unsure if it will influence my decision to attend (2)  
10  
11  
12  No- I will not sign up to attend future events if rapid testing was required (3)  
13  
14
- 

15  
16  
17 **Q13 What is your gender?**  
18

- 19  
20  Male (1)  
21  
22  Female (2)  
23  
24  Other (please specify) (3)  
25  
26 \_\_\_\_\_  
27
- 

28  
29  
30  
31 **Q14 How old are you? (in years)**  
32

33 \_\_\_\_\_  
34  
35

---

36  
37  
38 **Q15 What is your ethnicity?**  
39

- 40  
41  White (1)  
42  
43  Mixed/multiple ethnic groups (2)  
44  
45  Asian/Asian British (3)  
46  
47  Black/African/Caribbean/Black British (4)  
48  
49  Other (please specify): (5)  
50  
51 \_\_\_\_\_  
52  
53
-

1  
2  
3 **Q16 Thank you for taking the time to answer our survey.**  
4

5  
6 Researchers from Imperial College London are looking to interview up to 30 participants (via  
7 telephone, Skype or Microsoft Teams) to learn more about the specific themes raised in this  
8 survey. Interviews will last 25-35 minutes and may be done through video-conferencing such as  
9 Zoom or MS Teams. Please provide your name & contact details (below) if this interests you.  
10 We are happy to answer any questions on the study and can fix a suitable time and date for an  
11 interview. Thank you.  
12

13  
14  Name: (1) \_\_\_\_\_  
15

16  E-mail: (2) \_\_\_\_\_  
17

18  Mobile number: (3) \_\_\_\_\_  
19  
20  
21

22  
23  
24 **Q17** As a thank you for completing this valuable public health questionnaire, we are offering one  
25 person the chance to win 4x Weekend Tickets for Standon Calling 2022 with luxury boutique  
26 camping worth over £1000. To be in with a chance of winning, please enter the same email  
27 address that you used to register on the Certific video test app in the box below.  
28  
29

30 \_\_\_\_\_  
31  
32  
33  
34  
35  
36  
37  
38  
39  
40  
41  
42  
43  
44  
45  
46  
47  
48  
49  
50  
51  
52  
53  
54  
55  
56  
57  
58  
59  
60

# CAPACITY UK

## Interview Crib Sheet

---

### Brief overview

What is the purpose of the interview

How long it will be for

Ethics approval

Right to withdraw consent at any time

Check received PIS prior to interview

Answer any question

Audio recorded etc but anonymised

### Overall Experience

- What was your overall experience of the Standon Calling event and specifically the pre-event safety protocol -
  - pre-event questionnaires
    - Probes – time taken, understanding of questions, format of survey
    - What worked? What didn't work?
  - home-based testing
    - Probes –
      - Previous testing – frequency, confidence in testing
      - Effort and cost –satisfaction with cost and time taken
      - Privacy – views of videoing, data security
    - What worked? What didn't work?
  - Standon Calling Event
    - Probes –
      - Impact of the safety protocol on the event experience
      - Sense of whether COVID secure
      - COVID safety measures e.g. hand washing, social distancing
    - What worked? What didn't work?

### Video testing

- How did you feel about using video to demonstrate how you took the sample and the test result to a clinician?
  - Probe –
    - Privacy

Computational Modelling with rapid Antigen testing, to Predict and Acceptably minimise COVID-19 Impact and Transmission risk, for economical reopening of the Live Events Industry in the UK (CAPACITY UK)

v0.1 15/03/2021 Page 1 of 2

- Intrusiveness
- Convenience
- Technology issues
- What do you think is the purpose of video testing?
- What is the benefit of video testing everyone at the event?
- How confident were you in self-testing prior to the event?
- In what way has being videoed changed the way you do LFTs at home?

### Safety protocol

- The safety protocol at the event involved the home testing and the pre and post-test isolation. How would you describe your experience of the safety protocol as a whole?
  - How did you feel about the pre and post-test isolation?
    - Did you adhere to it? Do you think others adhered to it?
  - Would you recommend this pathway be used in other events in the future?
  - What other types of events, like parties, or smaller gatherings, or routine events like offices and schools, do you think this could work well for?
  - What are the benefits to this type of safety protocol?
  - What are the disadvantages to this type of safety protocol?
  - Do you think people 'mis-take' self tests or don't do them really thoroughly for any reason?
  - Did you have a group booking? What issues were there with respect to this safety protocol as a group?
  - To what extent do you think people doing their own medically certified home-based tests, even for other issues such as flu, HIV, diabetes, might be useful?

### Personal risk score

- Based on your own vaccine status, the vaccine status of everyone else at the event and the characteristics of the venue, your individual risk of catching COVID at the event could have been provided to you on your mobile phone
  - What do you think of that?
  - Would you have found it useful?
  - How would you have used that information?
  - Can you describe what level of risk you would have been comfortable with?

# Supplemental material

Supplemental Table S1: survey results.

|                                                                                                                                                                        | N    | %     |
|------------------------------------------------------------------------------------------------------------------------------------------------------------------------|------|-------|
| <b>Total</b>                                                                                                                                                           | 1093 | 100.0 |
| <b>How confident do you feel to correctly complete the LFT yourself or on others in the future after completing videoed testing on the CERTIFIC App or Web portal?</b> |      |       |
| Very confident - the app has made me more confident to self-test correctly                                                                                             | 492  | 45.0  |
| No difference - this was exactly the same as what I always did                                                                                                         | 598  | 54.7  |
| Not confident - I am still not confident to self-test correctly                                                                                                        | 3    | 0.3   |
| <b>To what extent do you agree or disagree with the following statements?</b>                                                                                          |      |       |
| <i>Pre-event testing reduces the risk of catching COVID</i>                                                                                                            |      |       |
| Strongly disagree                                                                                                                                                      | 31   | 2.8   |
| Disagree                                                                                                                                                               | 42   | 3.8   |
| Neutral                                                                                                                                                                | 70   | 6.4   |
| Agree                                                                                                                                                                  | 536  | 49.0  |
| Strongly agree                                                                                                                                                         | 415  | 38.0  |
| <i>The pre-event testing with CERTIFIC was convenient</i>                                                                                                              |      |       |
| Strongly disagree                                                                                                                                                      | 12   | 1.1   |
| Disagree                                                                                                                                                               | 62   | 5.7   |
| Neutral                                                                                                                                                                | 133  | 12.2  |
| Agree                                                                                                                                                                  | 563  | 51.5  |
| Strongly agree                                                                                                                                                         | 322  | 29.5  |
| <i>I prefer home based testing than at-the-door testing</i>                                                                                                            |      |       |
| Strongly disagree                                                                                                                                                      | 16   | 1.5   |
| Disagree                                                                                                                                                               | 16   | 1.5   |
| Neutral                                                                                                                                                                | 84   | 7.7   |
| Agree                                                                                                                                                                  | 422  | 38.6  |
| Strongly agree                                                                                                                                                         | 554  | 50.7  |
| <i>Knowing that everyone at the event had been tested made me feel safer</i>                                                                                           |      |       |
| Strongly disagree                                                                                                                                                      | 11   | 1.0   |
| Disagree                                                                                                                                                               | 26   | 2.4   |
| Neutral                                                                                                                                                                | 121  | 11.1  |
| Agree                                                                                                                                                                  | 460  | 42.1  |
| Strongly agree                                                                                                                                                         | 474  | 43.4  |
| <i>Pre-event testing is helpful but I understand that it cannot reduce risk to zero</i>                                                                                |      |       |
| Strongly disagree                                                                                                                                                      | 8    | 0.7   |
| Disagree                                                                                                                                                               | 7    | 0.6   |
| Neutral                                                                                                                                                                | 13   | 1.2   |
| Agree                                                                                                                                                                  | 401  | 36.7  |
| Strongly agree                                                                                                                                                         | 665  | 60.8  |
| <i>Knowing that the pre-event tests were videoed gave me confidence in their results</i>                                                                               |      |       |

|    |                                                                                                |             |             |
|----|------------------------------------------------------------------------------------------------|-------------|-------------|
| 1  |                                                                                                |             |             |
| 2  |                                                                                                |             |             |
| 3  | Strongly disagree                                                                              | 16          | 1.5         |
| 4  | Disagree                                                                                       | 57          | 5.2         |
| 5  | Neutral                                                                                        | 187         | 17.1        |
| 6  | Agree                                                                                          | 493         | 45.1        |
| 7  | Strongly agree                                                                                 | 340         | 31.1        |
| 8  |                                                                                                |             |             |
| 9  | <i>Pre-event testing interfered with how much fun I had at the event</i>                       |             |             |
| 10 | Strongly disagree                                                                              | 739         | 67.6        |
| 11 | Disagree                                                                                       | 285         | 26.1        |
| 12 | Neutral                                                                                        | 38          | 3.5         |
| 13 | Agree                                                                                          | 14          | 1.3         |
| 14 | Strongly agree                                                                                 | 16          | 1.5         |
| 15 |                                                                                                |             |             |
| 16 | <i>I would recommend that other events adopt video-witnessed testing at home</i>               |             |             |
| 17 | Strongly disagree                                                                              | 12          | 1.1         |
| 18 | Disagree                                                                                       | 39          | 3.6         |
| 19 | Neutral                                                                                        | 208         | 19.0        |
| 20 | Agree                                                                                          | 453         | 41.4        |
| 21 | Strongly agree                                                                                 | 381         | 34.9        |
| 22 |                                                                                                |             |             |
| 23 | <i>I found the added cost of the pre-event test to be reasonable</i>                           |             |             |
| 24 | Strongly disagree                                                                              | 12          | 1.1         |
| 25 | Disagree                                                                                       | 57          | 5.2         |
| 26 | Neutral                                                                                        | 220         | 20.1        |
| 27 | Agree                                                                                          | 560         | 51.2        |
| 28 | Strongly agree                                                                                 | 245         | 22.4        |
| 29 |                                                                                                |             |             |
| 30 | <i>I was NOT concerned about the security of my data</i>                                       |             |             |
| 31 | Strongly disagree                                                                              | 16          | 1.5         |
| 32 | Disagree                                                                                       | 69          | 6.3         |
| 33 | Neutral                                                                                        | 214         | 19.6        |
| 34 | Agree                                                                                          | 534         | 48.9        |
| 35 | Strongly agree                                                                                 | 259         | 23.7        |
| 36 |                                                                                                |             |             |
| 37 | <i>I did NOT feel the video-witnessed testing was intrusive</i>                                |             |             |
| 38 | Strongly disagree                                                                              | 8           | 0.7         |
| 39 | Disagree                                                                                       | 56          | 5.1         |
| 40 | Neutral                                                                                        | 125         | 11.4        |
| 41 | Agree                                                                                          | 607         | 55.5        |
| 42 | Strongly agree                                                                                 | 298         | 27.3        |
| 43 |                                                                                                |             |             |
| 44 | <i>I would have valued receiving my personal risk score of catching COVID at the event</i>     |             |             |
| 45 | Strongly disagree                                                                              | 49          | 4.5         |
| 46 | Disagree                                                                                       | 165         | 15.1        |
| 47 | Neutral                                                                                        | 380         | 34.8        |
| 48 | Agree                                                                                          | 393         | 36.0        |
| 49 | Strongly agree                                                                                 | 105         | 9.6         |
| 50 |                                                                                                |             |             |
| 51 | <b>Have you tested positive for COVID since attending Standon Calling?</b>                     |             |             |
| 52 | <b>No – I did not test positive for COVID within the first 2 weeks of participating in SCF</b> | <b>1055</b> | <b>96.5</b> |
| 53 |                                                                                                |             |             |
| 54 |                                                                                                |             |             |
| 55 |                                                                                                |             |             |
| 56 |                                                                                                |             |             |
| 57 |                                                                                                |             |             |
| 58 |                                                                                                |             |             |
| 59 |                                                                                                |             |             |
| 60 |                                                                                                |             |             |



1  
2  
3  
4  
5  
6  
7  
8  
9  
10  
11  
12  
13  
14  
15  
16  
17  
18  
19  
20  
21  
22  
23  
24  
25  
26  
27  
28  
29  
30  
31  
32  
33  
34  
35  
36  
37  
38  
39  
40  
41  
42  
43  
44  
45  
46  
47  
48  
49  
50  
51  
52  
53  
54  
55  
56  
57  
58  
59  
60

|                                                                                                                                                    |      |      |
|----------------------------------------------------------------------------------------------------------------------------------------------------|------|------|
| <b>Yes – I tested positive for COVID within 2 weeks of participating in SCF</b>                                                                    | 38   | 3.5  |
| <b>How did you access the CERTIFIC platform?</b>                                                                                                   |      |      |
| <b>App for Apple (iOS)</b>                                                                                                                         | 709  | 64.9 |
| <b>App for Android/Google</b>                                                                                                                      | 303  | 27.7 |
| <b>Web-based</b>                                                                                                                                   | 80   | 7.3  |
| <b>Other</b>                                                                                                                                       | 1    | 0.1  |
| <b>Please tell us your views about using the CERTIFIC App (please tick all that apply)</b>                                                         |      |      |
| <b>The app was relatively easy to use</b>                                                                                                          | 987  | 90.3 |
| <b>The procedure was not very time consuming</b>                                                                                                   | 648  | 59.3 |
| <b>I felt my data was safeguarded</b>                                                                                                              | 399  | 36.5 |
| <b>I still have the app on my phone</b>                                                                                                            | 387  | 35.4 |
| <b>I would recommend using the CERTIFIC app for this purpose to my friends and family</b>                                                          | 565  | 51.7 |
| <b>To what extent did you wear a mask, maintained social distancing and/or washed your hands during the event?</b>                                 |      |      |
| <b><i>I consistently wore a face mask/face covering</i></b>                                                                                        |      |      |
| <b>Not at all</b>                                                                                                                                  | 598  | 54.7 |
| <b>Not really</b>                                                                                                                                  | 228  | 20.9 |
| <b>To some extent</b>                                                                                                                              | 225  | 20.6 |
| <b>Yes, mostly</b>                                                                                                                                 | 42   | 3.8  |
| <b><i>I maintained social distancing</i></b>                                                                                                       |      |      |
| <b>Not at all</b>                                                                                                                                  | 322  | 29.5 |
| <b>Not really</b>                                                                                                                                  | 317  | 29.0 |
| <b>To some extent</b>                                                                                                                              | 365  | 33.4 |
| <b>Yes, mostly</b>                                                                                                                                 | 89   | 8.1  |
| <b><i>I maintained regular hand washing</i></b>                                                                                                    |      |      |
| <b>Not at all</b>                                                                                                                                  | 47   | 4.3  |
| <b>Not really</b>                                                                                                                                  | 128  | 11.7 |
| <b>To some extent</b>                                                                                                                              | 359  | 32.8 |
| <b>Yes, mostly</b>                                                                                                                                 | 560  | 51.2 |
| <b>How many people (other than yourself) did you attend the event with?</b>                                                                        |      |      |
| <b>I went alone</b>                                                                                                                                | 9    | 0.8  |
| <b>+1</b>                                                                                                                                          | 203  | 18.6 |
| <b>+2</b>                                                                                                                                          | 107  | 9.8  |
| <b>+3 or more</b>                                                                                                                                  | 774  | 70.8 |
| <b>If at-home, videoed, rapid testing is required to be completed in a similar fashion for future events, would you still attend those events?</b> |      |      |
| <b>Yes – it makes no difference to my decision to attend</b>                                                                                       | 1023 | 93.6 |
| <b>Unsure if it will influence my decision to attend</b>                                                                                           | 67   | 6.1  |
| <b>No – I will not sign up to attend future events if rapid testing was required</b>                                                               | 3    | 0.3  |

## COREQ (CONsolidated criteria for REporting Qualitative research) Checklist

A checklist of items that should be included in reports of qualitative research. You must report the page number in your manuscript where you consider each of the items listed in this checklist. If you have not included this information, either revise your manuscript accordingly before submitting or note N/A.

| Topic                                          | Item No. | Guide Questions/Description                                                                                                                              | Reported on Page No. |
|------------------------------------------------|----------|----------------------------------------------------------------------------------------------------------------------------------------------------------|----------------------|
| <b>Domain 1: Research team and reflexivity</b> |          |                                                                                                                                                          |                      |
| <i>Personal characteristics</i>                |          |                                                                                                                                                          |                      |
| Interviewer/facilitator                        | 1        | Which author/s conducted the interview or focus group?                                                                                                   |                      |
| Credentials                                    | 2        | What were the researcher's credentials? E.g. PhD, MD                                                                                                     |                      |
| Occupation                                     | 3        | What was their occupation at the time of the study?                                                                                                      |                      |
| Gender                                         | 4        | Was the researcher male or female?                                                                                                                       |                      |
| Experience and training                        | 5        | What experience or training did the researcher have?                                                                                                     |                      |
| <i>Relationship with participants</i>          |          |                                                                                                                                                          |                      |
| Relationship established                       | 6        | Was a relationship established prior to study commencement?                                                                                              |                      |
| Participant knowledge of the interviewer       | 7        | What did the participants know about the researcher? e.g. personal goals, reasons for doing the research                                                 |                      |
| Interviewer characteristics                    | 8        | What characteristics were reported about the interviewer/facilitator? e.g. Bias, assumptions, reasons and interests in the research topic                |                      |
| <b>Domain 2: Study design</b>                  |          |                                                                                                                                                          |                      |
| <i>Theoretical framework</i>                   |          |                                                                                                                                                          |                      |
| Methodological orientation and Theory          | 9        | What methodological orientation was stated to underpin the study? e.g. grounded theory, discourse analysis, ethnography, phenomenology, content analysis |                      |
| <i>Participant selection</i>                   |          |                                                                                                                                                          |                      |
| Sampling                                       | 10       | How were participants selected? e.g. purposive, convenience, consecutive, snowball                                                                       |                      |
| Method of approach                             | 11       | How were participants approached? e.g. face-to-face, telephone, mail, email                                                                              |                      |
| Sample size                                    | 12       | How many participants were in the study?                                                                                                                 |                      |
| Non-participation                              | 13       | How many people refused to participate or dropped out? Reasons?                                                                                          |                      |
| <i>Setting</i>                                 |          |                                                                                                                                                          |                      |
| Setting of data collection                     | 14       | Where was the data collected? e.g. home, clinic, workplace                                                                                               |                      |
| Presence of non-participants                   | 15       | Was anyone else present besides the participants and researchers?                                                                                        |                      |
| Description of sample                          | 16       | What are the important characteristics of the sample? e.g. demographic data, date                                                                        |                      |
| <i>Data collection</i>                         |          |                                                                                                                                                          |                      |
| Interview guide                                | 17       | Were questions, prompts, guides provided by the authors? Was it pilot tested?                                                                            |                      |
| Repeat interviews                              | 18       | Were repeat interviews carried out? If yes, how many?                                                                                                    |                      |
| Audio/visual recording                         | 19       | Did the research use audio or visual recording to collect the data?                                                                                      |                      |
| Field notes                                    | 20       | Were field notes made during and/or after the interview or focus group?                                                                                  |                      |
| Duration                                       | 21       | What was the duration of the interviews or focus group?                                                                                                  |                      |
| Data saturation                                | 22       | Was data saturation discussed?                                                                                                                           |                      |
| Transcripts returned                           | 23       | Were transcripts returned to participants for comment and/or                                                                                             |                      |

| Topic                                  | Item No. | Guide Questions/Description                                                                                                        | Reported on Page No. |
|----------------------------------------|----------|------------------------------------------------------------------------------------------------------------------------------------|----------------------|
|                                        |          | correction?                                                                                                                        |                      |
| <b>Domain 3: analysis and findings</b> |          |                                                                                                                                    |                      |
| <i>Data analysis</i>                   |          |                                                                                                                                    |                      |
| Number of data coders                  | 24       | How many data coders coded the data?                                                                                               |                      |
| Description of the coding tree         | 25       | Did authors provide a description of the coding tree?                                                                              |                      |
| Derivation of themes                   | 26       | Were themes identified in advance or derived from the data?                                                                        |                      |
| Software                               | 27       | What software, if applicable, was used to manage the data?                                                                         |                      |
| Participant checking                   | 28       | Did participants provide feedback on the findings?                                                                                 |                      |
| <i>Reporting</i>                       |          |                                                                                                                                    |                      |
| Quotations presented                   | 29       | Were participant quotations presented to illustrate the themes/findings?<br>Was each quotation identified? e.g. participant number |                      |
| Data and findings consistent           | 30       | Was there consistency between the data presented and the findings?                                                                 |                      |
| Clarity of major themes                | 31       | Were major themes clearly presented in the findings?                                                                               |                      |
| Clarity of minor themes                | 32       | Is there a description of diverse cases or discussion of minor themes?                                                             |                      |

Developed from: Tong A, Sainsbury P, Craig J. Consolidated criteria for reporting qualitative research (COREQ): a 32-item checklist for interviews and focus groups. *International Journal for Quality in Health Care*. 2007. Volume 19, Number 6: pp. 349 – 357

**Once you have completed this checklist, please save a copy and upload it as part of your submission. DO NOT include this checklist as part of the main manuscript document. It must be uploaded as a separate file.**

### Checklist for Reporting Results of Internet E-Surveys (CHERRIES)

| <b>Checklist Item</b>                    | <b>Explanation</b>                                                                                                                                                                                                                                                                                                                                                                                                                                                           | <b>Page Number</b> |
|------------------------------------------|------------------------------------------------------------------------------------------------------------------------------------------------------------------------------------------------------------------------------------------------------------------------------------------------------------------------------------------------------------------------------------------------------------------------------------------------------------------------------|--------------------|
| Describe survey design                   | A total of 1,093 participants completed the survey out of the 4,726 that were contacted (response rate 23.1%).                                                                                                                                                                                                                                                                                                                                                               | 7                  |
| IRB approval                             | The study received ethical approval from the Imperial College London Ethics Committee (ICREC 211C6705).                                                                                                                                                                                                                                                                                                                                                                      | 7                  |
| Informed consent                         | Consent to enter the study was sought from each participant only after a full explanation of the study was given, documentation was offered, and time allowed for consideration. The right of the participant to refuse to participate without giving reasons was respected. All participants were free to withdraw at any time and without giving reasons. Participants were notified on the plans for publication and were reminded that all their data was pseudonymised. | 15                 |
| Data protection                          | All data was stored on a password encrypted database which only the study team had access to.                                                                                                                                                                                                                                                                                                                                                                                | 6                  |
| Development and testing                  | Members of the study team beta-tested the survey for usability and technical functionality of the electronic questionnaire before fielding the questionnaire.                                                                                                                                                                                                                                                                                                                | 5                  |
| Open survey versus closed survey         | The online survey comprised of 17 total items organised in five different blocks.                                                                                                                                                                                                                                                                                                                                                                                            | 6                  |
| Contact mode                             | Adults who attended SCF in July 2021 and gave permission to be contacted by the research team during ticket purchase were eligible to participate in the survey and were contacted via email.                                                                                                                                                                                                                                                                                | 5                  |
| Advertising the survey                   | NA                                                                                                                                                                                                                                                                                                                                                                                                                                                                           | NA                 |
| Web/E-mail                               | The online survey comprised of 17 total items organised in five different blocks.                                                                                                                                                                                                                                                                                                                                                                                            | 6                  |
| Context                                  | The survey was distributed via web-link on the Qualtrics platform.                                                                                                                                                                                                                                                                                                                                                                                                           | 5                  |
| Mandatory/voluntary                      | The survey was voluntary, and participants were free to decide whether they wanted to take part.                                                                                                                                                                                                                                                                                                                                                                             | 5                  |
| Incentives                               | NA                                                                                                                                                                                                                                                                                                                                                                                                                                                                           | NA                 |
| Time/Date                                | Participants were surveyed anonymously in the first two weeks of November 2021 through an online questionnaire to capture their views and experiences regarding SCF.                                                                                                                                                                                                                                                                                                         | 5                  |
| Randomization of items or questionnaires | NA                                                                                                                                                                                                                                                                                                                                                                                                                                                                           | NA                 |
| Adaptive questioning                     | NA                                                                                                                                                                                                                                                                                                                                                                                                                                                                           | NA                 |
| Number of Items                          | The online survey comprised of 17 total items organised in five different blocks.                                                                                                                                                                                                                                                                                                                                                                                            | 6                  |

|                                                                                                           |                                                                                          |    |
|-----------------------------------------------------------------------------------------------------------|------------------------------------------------------------------------------------------|----|
| Number of screens (pages)                                                                                 | NA                                                                                       | NA |
| Completeness check                                                                                        | NA                                                                                       | NA |
| Review step                                                                                               | Participants were free to change their answers until the point of submitting the survey. | 6  |
| Unique site visitor                                                                                       | NA                                                                                       | NA |
| View rate (Ratio of unique survey visitors/unique site visitors)                                          | NA                                                                                       | NA |
| Participation rate (Ratio of unique visitors who agreed to participate/unique first survey page visitors) | NA                                                                                       | NA |
| Completion rate (Ratio of users who finished the survey/users who agreed to participate)                  | NA                                                                                       | NA |
| Cookies used                                                                                              | NA                                                                                       | NA |
| IP check                                                                                                  | NA                                                                                       | NA |
| Log file analysis                                                                                         | NA                                                                                       | NA |
| Registration                                                                                              | NA                                                                                       | NA |
| Handling of incomplete questionnaires                                                                     | NA                                                                                       | NA |
| Questionnaires submitted with an atypical timestamp                                                       | NA                                                                                       | NA |
| Statistical correction                                                                                    | NA                                                                                       | NA |

This checklist has been modified from Eysenbach G. Improving the quality of Web surveys: the Checklist for Reporting Results of Internet E-Surveys (CHERRIES). J Med Internet Res. 2004 Sep 29;6(3):e34 [erratum in J Med Internet Res. 2012; 14(1): e8.]. Article available at <https://www.jmir.org/2004/3/e34/>; erratum available <https://www.jmir.org/2012/1/e8/>. Copyright ©Gunther Eysenbach. Originally published in the [Journal of Medical Internet Research](#), 29.9.2004 and 04.01.2012.

1  
2  
3 This is an open-access article distributed under the terms of the Creative Commons Attribution License (<https://creativecommons.org/licenses/by/2.0/>),  
4 which permits unrestricted use, distribution, and reproduction in any medium, provided the original work, first published in the Journal of Medical Internet  
5 Research, is properly cited.  
6  
7  
8  
9  
10  
11  
12  
13  
14  
15  
16  
17  
18  
19  
20  
21  
22  
23  
24  
25  
26  
27  
28  
29  
30  
31  
32  
33  
34  
35  
36  
37  
38  
39  
40  
41  
42  
43  
44  
45  
46

For peer review only
