# Supplementary material for: Evaluating the feasibility and acceptability of a safety protocol to mitigate SARS-CoV-2 transmission risks when participating in full-capacity live mass events: a cross-sectional survey and interview-based study
Source: PubMed Central journal article supplement — BMJ Open. 2022 Dec 23;12(12):e063838. doi: 10.1136/bmjopen-2022-063838 (PMC9791109; doi:10.1136/bmjopen-2022-063838), 2022-12-23
Supplement: bmjopen-2022-063838supp001.pdf [file bmjopen-2022-063838supp001.pdf]

# STANDON-CALLING's IMPERIAL COLLEGE POST-EVENT RESEARCH eSurvey Export

---

Q1

Researchers at the Department of Primary Care & Public Health, Imperial College London are inviting you to participate in a study related to the Standon Calling live event (22-25 July 2021) which you attended.

At the event, you provided consent to be contacted by the research team so that they might learn about your experience of purchasing a ticket and the event itself. Standon Calling involved pre-event home based COVID-19 tests and questionnaires. Through this short (10 minutes) electronic survey we would like to learn about your perspectives of those processes and their impact on your experience at the festival.

Please take a moment to review the [Participant Information Sheet](#) to learn more about the study.

---

**Q2 Please confirm that you consent to participate in this survey**

- Yes, I consent to contribute to the research (1)
  - No, thank you. I prefer not to contribute to the research (2)
- 

**Q3 Prior to purchasing your ticket to the Standon Calling live event, did you routinely do rapid lateral flow tests at home for COVID?**

- Yes - I've done testing at home, at least once a week (1)
- Yes - I have done a few tests in the past, but not regularly (2)
- No - I've never routinely done rapid tests (3)

---

**Q4 Having completed your videoed lateral flow test on the CERTIFIC App or Web portal, do you feel more confident that you would be able to correctly do the test on yourself or on others in the future?**

- Yes - the app has made me more confident to self-test correctly (1)
  - No Difference - this was exactly the same as what I always did (2)
  - No - I am still not confident to self-test correctly (3)
-

Q5

**To what extent do you agree or disagree with the following statements?**

|                                                                                        | Strongly disagree (1) | Disagree (2)          | Neutral (3)           | Agree (4)             | Strongly agree (5)    |
|----------------------------------------------------------------------------------------|-----------------------|-----------------------|-----------------------|-----------------------|-----------------------|
| Pre-event testing reduces the risk of catching COVID (9)                               | <input type="radio"/> |
| The pre-event testing with CERTIFIC was convenient (12)                                | <input type="radio"/> |
| I prefer home based testing than at-the-door testing (10)                              | <input type="radio"/> |
| Knowing that everyone at the event had been tested made me feel safer (4)              | <input type="radio"/> |
| Pre-event testing is helpful but I understand that it cannot reduce risk to zero (6)   | <input type="radio"/> |
| Knowing that the pre-event tests were videoed gave me confidence in their results (13) | <input type="radio"/> |

|                                                                                          |                       |                       |                       |                       |                       |
|------------------------------------------------------------------------------------------|-----------------------|-----------------------|-----------------------|-----------------------|-----------------------|
| Pre-event testing interfered with how much fun I had at the event (14)                   | <input type="radio"/> |
| I would recommend that other events adopt video-witnessed testing at home (15)           | <input type="radio"/> |
| I found the added cost of the pre-event test to be reasonable (16)                       | <input type="radio"/> |
| I was NOT concerned about the security of my data (17)                                   | <input type="radio"/> |
| I did NOT feel the video-witnessed testing was intrusive (18)                            | <input type="radio"/> |
| I would have valued receiving my personal risk score of catching COVID at the event (19) | <input type="radio"/> |

**Q6 Have you tested positive for COVID since attending Standon Calling?**

- No- I did not test positive for COVID within the first 2 weeks of participating in Standon Calling (1)
- Yes- I tested positive for COVID within 2 weeks of participating in Standon Calling (2)
- 

**Q7 How did you access the CERTIFIC platform?**

- App for Apple (IOS) (1)
- App for Android / Google (2)
- Web-based (4)
- Other (5)
- 

**Q8 Please tell us your views about using the CERTIFIC App (please tick all that apply)**

- The app was relatively easy to use (2)
- The procedure was not very time consuming (4)
- I felt my data was safeguarded (3)
- I still have the app on my phone (5)
- I would recommend using the CERTIFIC app for this purpose to my friends & family (6)
-

**Q9 To what extent did you wear a mask, maintained social distancing and/or washed your hands during the Standon Calling event?**

|                                                     | Not at all (1)        | Not really (4)        | To some extent (2)    | Yes, mostly (3)       |
|-----------------------------------------------------|-----------------------|-----------------------|-----------------------|-----------------------|
| I consistently wore a face mask / face covering (2) | <input type="radio"/> | <input type="radio"/> | <input type="radio"/> | <input type="radio"/> |
| I maintained social distancing (3)                  | <input type="radio"/> | <input type="radio"/> | <input type="radio"/> | <input type="radio"/> |
| I maintained regular hand washing (4)               | <input type="radio"/> | <input type="radio"/> | <input type="radio"/> | <input type="radio"/> |

**Q10 How many people (other than yourself) did you attend the event with?**

- I went alone (4)
- +1 (1)
- +2 (2)
- +3 or more (3)

**Q11 Please tell us about your vaccine status prior to attending the event (choose one that applies):**

- I was not vaccinated against COVID (1)
- I had already received 1 dose (partially vaccinated) (2)
- I had already received 2 doses (fully vaccinated) (3)

**Q12 If at-home, videoed, rapid testing is required to be completed in a similar fashion for future events, would you still attend those events?**

- Yes- it makes no difference to my decision to attend (1)
- Unsure if it will influence my decision to attend (2)
- No- I will not sign up to attend future events if rapid testing was required (3)
- 

**Q13 What is your gender?**

- Male (1)
- Female (2)
- Other (please specify) (3)
- 

**Q14 How old are you? (in years)**

---

**Q15 What is your ethnicity?**

- White (1)
- Mixed/multiple ethnic groups (2)
- Asian/Asian British (3)
- Black/African/Caribbean/Black British (4)
- Other (please specify): (5)
-



**Q16 Thank you for taking the time to answer our survey.**

Researchers from Imperial College London are looking to interview up to 30 participants (via telephone, Skype or Microsoft Teams) to learn more about the specific themes raised in this survey. Interviews will last 25-35 minutes and may be done through video-conferencing such as Zoom or MS Teams. Please provide your name & contact details (below) if this interests you. We are happy to answer any questions on the study and can fix a suitable time and date for an interview. Thank you.

Name: (1) \_\_\_\_\_

E-mail: (2) \_\_\_\_\_

Mobile number: (3) \_\_\_\_\_

---

Q17 As a thank you for completing this valuable public health questionnaire, we are offering one person the chance to win 4x Weekend Tickets for Standon Calling 2022 with luxury boutique camping worth over £1000. To be in with a chance of winning, please enter the same email address that you used to register on the Certific video test app in the box below.

\_\_\_\_\_

\_\_\_\_\_
