# Supplementary material for: Evaluating the feasibility and acceptability of a safety protocol to mitigate SARS-CoV-2 transmission risks when participating in full-capacity live mass events: a cross-sectional survey and interview-based study
Source: PubMed Central journal article supplement — BMJ Open. 2022 Dec 23;12(12):e063838. doi: 10.1136/bmjopen-2022-063838 (PMC9791109; doi:10.1136/bmjopen-2022-063838), 2022-12-23
Supplement: bmjopen-2022-063838supp002.pdf [file bmjopen-2022-063838supp002.pdf]

# CAPACITY UK

## Interview Crib Sheet

---

### Brief overview

What is the purpose of the interview

How long it will be for

Ethics approval

Right to withdraw consent at any time

Check received PIS prior to interview

Answer any question

Audio recorded etc but anonymised

### Overall Experience

- What was your overall experience of the Standon Calling event and specifically the pre-event safety protocol -
  - pre-event questionnaires
    - Probes – time taken, understanding of questions, format of survey
    - What worked? What didn't work?
  - home-based testing
    - Probes –
      - Previous testing – frequency, confidence in testing
      - Effort and cost –satisfaction with cost and time taken
      - Privacy – views of videoing, data security
    - What worked? What didn't work?
  - Standon Calling Event
    - Probes –
      - Impact of the safety protocol on the event experience
      - Sense of whether COVID secure
      - COVID safety measures e.g. hand washing, social distancing
    - What worked? What didn't work?

### Video testing

- How did you feel about using video to demonstrate how you took the sample and the test result to a clinician?
  - Probe –
    - Privacy

Computational Modelling with rapid Antigen testing, to Predict and Acceptably minimise COVID-19 Impact and Transmission risk, for economical reopening of the Live Events Industry in the UK (CAPACITY UK)

v0.1 15/03/2021 Page 1 of 2

- Intrusiveness
- Convenience
- Technology issues
- What do you think is the purpose of video testing?
- What is the benefit of video testing everyone at the event?
- How confident were you in self-testing prior to the event?
- In what way has being videoed changed the way you do LFTs at home?

### Safety protocol

- The safety protocol at the event involved the home testing and the pre and post-test isolation. How would you describe your experience of the safety protocol as a whole?
  - How did you feel about the pre and post-test isolation?
    - Did you adhere to it? Do you think others adhered to it?
  - Would you recommend this pathway be used in other events in the future?
  - What other types of events, like parties, or smaller gatherings, or routine events like offices and schools, do you think this could work well for?
  - What are the benefits to this type of safety protocol?
  - What are the disadvantages to this type of safety protocol?
  - Do you think people 'mis-take' self tests or don't do them really thoroughly for any reason?
  - Did you have a group booking? What issues were there with respect to this safety protocol as a group?
  - To what extent do you think people doing their own medically certified home-based tests, even for other issues such as flu, HIV, diabetes, might be useful?

### Personal risk score

- Based on your own vaccine status, the vaccine status of everyone else at the event and the characteristics of the venue, your individual risk of catching COVID at the event could have been provided to you on your mobile phone
  - What do you think of that?
  - Would you have found it useful?
  - How would you have used that information?
  - Can you describe what level of risk you would have been comfortable with?
