# Supplementary material for: Evaluating the feasibility and acceptability of a safety protocol to mitigate SARS-CoV-2 transmission risks when participating in full-capacity live mass events: a cross-sectional survey and interview-based study
Source: PubMed Central journal article supplement — BMJ Open. 2022 Dec 23;12(12):e063838. doi: 10.1136/bmjopen-2022-063838 (PMC9791109; doi:10.1136/bmjopen-2022-063838), 2022-12-23
Supplement: bmjopen-2022-063838supp003.pdf [file bmjopen-2022-063838supp003.pdf]

# Supplemental material

Supplemental Table S1: survey results.

|                                                                                                                                                                        | N    | %     |
|------------------------------------------------------------------------------------------------------------------------------------------------------------------------|------|-------|
| Total                                                                                                                                                                  | 1093 | 100.0 |
| <b>How confident do you feel to correctly complete the LFT yourself or on others in the future after completing videoed testing on the CERTIFIC App or Web portal?</b> |      |       |
| Very confident - the app has made me more confident to self-test correctly                                                                                             | 492  | 45.0  |
| No difference - this was exactly the same as what I always did                                                                                                         | 598  | 54.7  |
| Not confident - I am still not confident to self-test correctly                                                                                                        | 3    | 0.3   |
| <b>To what extent do you agree or disagree with the following statements?</b>                                                                                          |      |       |
| <i>Pre-event testing reduces the risk of catching COVID</i>                                                                                                            |      |       |
| Strongly disagree                                                                                                                                                      | 31   | 2.8   |
| Disagree                                                                                                                                                               | 42   | 3.8   |
| Neutral                                                                                                                                                                | 70   | 6.4   |
| Agree                                                                                                                                                                  | 536  | 49.0  |
| Strongly agree                                                                                                                                                         | 415  | 38.0  |
| <i>The pre-event testing with CERTIFIC was convenient</i>                                                                                                              |      |       |
| Strongly disagree                                                                                                                                                      | 12   | 1.1   |
| Disagree                                                                                                                                                               | 62   | 5.7   |
| Neutral                                                                                                                                                                | 133  | 12.2  |
| Agree                                                                                                                                                                  | 563  | 51.5  |
| Strongly agree                                                                                                                                                         | 322  | 29.5  |
| <i>I prefer home based testing than at-the-door testing</i>                                                                                                            |      |       |
| Strongly disagree                                                                                                                                                      | 16   | 1.5   |
| Disagree                                                                                                                                                               | 16   | 1.5   |
| Neutral                                                                                                                                                                | 84   | 7.7   |
| Agree                                                                                                                                                                  | 422  | 38.6  |
| Strongly agree                                                                                                                                                         | 554  | 50.7  |
| <i>Knowing that everyone at the event had been tested made me feel safer</i>                                                                                           |      |       |
| Strongly disagree                                                                                                                                                      | 11   | 1.0   |
| Disagree                                                                                                                                                               | 26   | 2.4   |
| Neutral                                                                                                                                                                | 121  | 11.1  |
| Agree                                                                                                                                                                  | 460  | 42.1  |
| Strongly agree                                                                                                                                                         | 474  | 43.4  |
| <i>Pre-event testing is helpful but I understand that it cannot reduce risk to zero</i>                                                                                |      |       |
| Strongly disagree                                                                                                                                                      | 8    | 0.7   |
| Disagree                                                                                                                                                               | 7    | 0.6   |
| Neutral                                                                                                                                                                | 13   | 1.2   |
| Agree                                                                                                                                                                  | 401  | 36.7  |
| Strongly agree                                                                                                                                                         | 665  | 60.8  |
| <i>Knowing that the pre-event tests were videoed gave me confidence in their results</i>                                                                               |      |       |

|                                                                                                   |             |             |
|---------------------------------------------------------------------------------------------------|-------------|-------------|
| Strongly disagree                                                                                 | 16          | 1.5         |
| Disagree                                                                                          | 57          | 5.2         |
| Neutral                                                                                           | 187         | 17.1        |
| Agree                                                                                             | 493         | 45.1        |
| Strongly agree                                                                                    | 340         | 31.1        |
| <b><i>Pre-event testing interfered with how much fun I had at the event</i></b>                   |             |             |
| Strongly disagree                                                                                 | 739         | 67.6        |
| Disagree                                                                                          | 285         | 26.1        |
| Neutral                                                                                           | 38          | 3.5         |
| Agree                                                                                             | 14          | 1.3         |
| Strongly agree                                                                                    | 16          | 1.5         |
| <b><i>I would recommend that other events adopt video-witnessed testing at home</i></b>           |             |             |
| Strongly disagree                                                                                 | 12          | 1.1         |
| Disagree                                                                                          | 39          | 3.6         |
| Neutral                                                                                           | 208         | 19.0        |
| Agree                                                                                             | 453         | 41.4        |
| Strongly agree                                                                                    | 381         | 34.9        |
| <b><i>I found the added cost of the pre-event test to be reasonable</i></b>                       |             |             |
| Strongly disagree                                                                                 | 12          | 1.1         |
| Disagree                                                                                          | 57          | 5.2         |
| Neutral                                                                                           | 220         | 20.1        |
| Agree                                                                                             | 560         | 51.2        |
| Strongly agree                                                                                    | 245         | 22.4        |
| <b><i>I was NOT concerned about the security of my data</i></b>                                   |             |             |
| Strongly disagree                                                                                 | 16          | 1.5         |
| Disagree                                                                                          | 69          | 6.3         |
| Neutral                                                                                           | 214         | 19.6        |
| Agree                                                                                             | 534         | 48.9        |
| Strongly agree                                                                                    | 259         | 23.7        |
| <b><i>I did NOT feel the video-witnessed testing was intrusive</i></b>                            |             |             |
| Strongly disagree                                                                                 | 8           | 0.7         |
| Disagree                                                                                          | 56          | 5.1         |
| Neutral                                                                                           | 125         | 11.4        |
| Agree                                                                                             | 607         | 55.5        |
| Strongly agree                                                                                    | 298         | 27.3        |
| <b><i>I would have valued receiving my personal risk score of catching COVID at the event</i></b> |             |             |
| Strongly disagree                                                                                 | 49          | 4.5         |
| Disagree                                                                                          | 165         | 15.1        |
| Neutral                                                                                           | 380         | 34.8        |
| Agree                                                                                             | 393         | 36.0        |
| Strongly agree                                                                                    | 105         | 9.6         |
| <b>Have you tested positive for COVID since attending Standon Calling?</b>                        |             |             |
| <b>No – I did not test positive for COVID within the first 2 weeks of participating in SCF</b>    | <b>1055</b> | <b>96.5</b> |

|                                                                                                                                                    |      |      |
|----------------------------------------------------------------------------------------------------------------------------------------------------|------|------|
| Yes – I tested positive for COVID within 2 weeks of participating in SCF                                                                           | 38   | 3.5  |
| <b>How did you access the CERTIFIC platform?</b>                                                                                                   |      |      |
| App for Apple (iOS)                                                                                                                                | 709  | 64.9 |
| App for Android/Google                                                                                                                             | 303  | 27.7 |
| Web-based                                                                                                                                          | 80   | 7.3  |
| Other                                                                                                                                              | 1    | 0.1  |
| <b>Please tell us your views about using the CERTIFIC App (please tick all that apply)</b>                                                         |      |      |
| The app was relatively easy to use                                                                                                                 | 987  | 90.3 |
| The procedure was not very time consuming                                                                                                          | 648  | 59.3 |
| I felt my data was safeguarded                                                                                                                     | 399  | 36.5 |
| I still have the app on my phone                                                                                                                   | 387  | 35.4 |
| I would recommend using the CERTIFIC app for this purpose to my friends and family                                                                 | 565  | 51.7 |
| <b>To what extent did you wear a mask, maintained social distancing and/or washed your hands during the event?</b>                                 |      |      |
| <i>I consistently wore a face mask/face covering</i>                                                                                               |      |      |
| Not at all                                                                                                                                         | 598  | 54.7 |
| Not really                                                                                                                                         | 228  | 20.9 |
| To some extent                                                                                                                                     | 225  | 20.6 |
| Yes, mostly                                                                                                                                        | 42   | 3.8  |
| <i>I maintained social distancing</i>                                                                                                              |      |      |
| Not at all                                                                                                                                         | 322  | 29.5 |
| Not really                                                                                                                                         | 317  | 29.0 |
| To some extent                                                                                                                                     | 365  | 33.4 |
| Yes, mostly                                                                                                                                        | 89   | 8.1  |
| <i>I maintained regular hand washing</i>                                                                                                           |      |      |
| Not at all                                                                                                                                         | 47   | 4.3  |
| Not really                                                                                                                                         | 128  | 11.7 |
| To some extent                                                                                                                                     | 359  | 32.8 |
| Yes, mostly                                                                                                                                        | 560  | 51.2 |
| <b>How many people (other than yourself) did you attend the event with?</b>                                                                        |      |      |
| I went alone                                                                                                                                       | 9    | 0.8  |
| +1                                                                                                                                                 | 203  | 18.6 |
| +2                                                                                                                                                 | 107  | 9.8  |
| +3 or more                                                                                                                                         | 774  | 70.8 |
| <b>If at-home, videoed, rapid testing is required to be completed in a similar fashion for future events, would you still attend those events?</b> |      |      |
| Yes – it makes no difference to my decision to attend                                                                                              | 1023 | 93.6 |
| Unsure if it will influence my decision to attend                                                                                                  | 67   | 6.1  |
| No – I will not sign up to attend future events if rapid testing was required                                                                      | 3    | 0.3  |
